# Supplementary material for: Genome size and ploidy influence angiosperm species' biomass under nitrogen and phosphorus limitation
Source: PubMed Central journal article supplement (PMC4991274; doi:10.1111/nph.13881), 2016-02-15
Supplement: NPH-210-1195-s001.pdf [file NPH-210-1195-s001.pdf]

**New Phytologist Supporting Information Figs S1–S13, Tables S1–S12 and Methods S1**

Article title: Genome size and ploidy influence angiosperm species biomass under nitrogen and phosphorus limitation

Authors: Maïté S. Guignard, Richard A. Nichols, Robert J. Knell, Andy Macdonald, Mark Trimmer, Catalina-Andreea Romila, Ilia J. Leitch, and Andrew R. Leitch

Article acceptance date: 21 December 2015

The following Supporting Information is available for this article:

**Fig. S1** Histogram of (a) available angiosperm genome size (GS) data, and (b) GS of species present in the Park Grass data.

**Fig. S2** Diagram showing plot layout at the Park Grass Experiment with fertilizer treatments and plots sampled.

**Fig. S3** Phylogenetic tree of 60 angiosperm species present at the Park Grass experimental plots with GS and ploidy level.

**Fig. S4** Boxplots showing phylogenetic generalized-least squares (*pgls*) biomass-weighted mean 1C-values.

**Fig. S5** Boxplots of Fig. 2, showing the mean total biomass of each genomic group: diploid taxa with small GS, diploid taxa with large GS, polyploids with small GS; and polyploids with large GS.

**Fig. S6** Boxplots of Fig. 2, showing number of species in each genomic group: diploid taxa with small GS, diploid taxa with large GS, polyploids with small GS; and polyploids with large GS.

**Figs S7–S12** The following figures show results of using three different thresholds (in addition to the 5pg threshold in the main text) when defining large GS: 2.5, 3, and 6 pg.

**Fig. S13** Scatter plot showing phylogeny-independent contrasts (PIC) on  $\log_{10}$  mean guard cell length and  $\log_{10}$  1C-value in 27 taxa collected from the Park Grass Experiment plots.

**Table S1** List of and accessions obtained from NCBI's GenBank to estimate phylogenetic relationships

**Table S2** Taxa list with abbreviations, GS, ploidy, flow cytometry GS estimations, and allocated C-S-R strategy

**Table S3** Subplot summary: total biomass, number of species, mean GS, including mean *pgls* GS under control, N, P and N + P fertilizer treatments

**Table S4** Biomass, species numbers, and C-S-R-weighted biomass of the four genomic groups, where large GS  $\geq 5$ pg

**Table S5** ANOVA results testing significance of GS, ploidy, and fertilizer on biomass, species number, and C-S-R weighted biomass, where large GS  $\geq 5$ pg

**Table S6** ANOVA results testing N and P significance on mean *pgls* GS under control, N, P and N + P fertilizer treatments

**Tables S7–S12** Summary statistics and ANOVA results from analyses using three different thresholds when defining large GS: 2.5, 3, and 6 pg

**Methods S1** Phylogenetic tree in Newick format used in *pgls* and phylogenetic generalised mixed model analyses.

**Methods S2** Park Grass species biomass data in CSV format (separate CSV file).

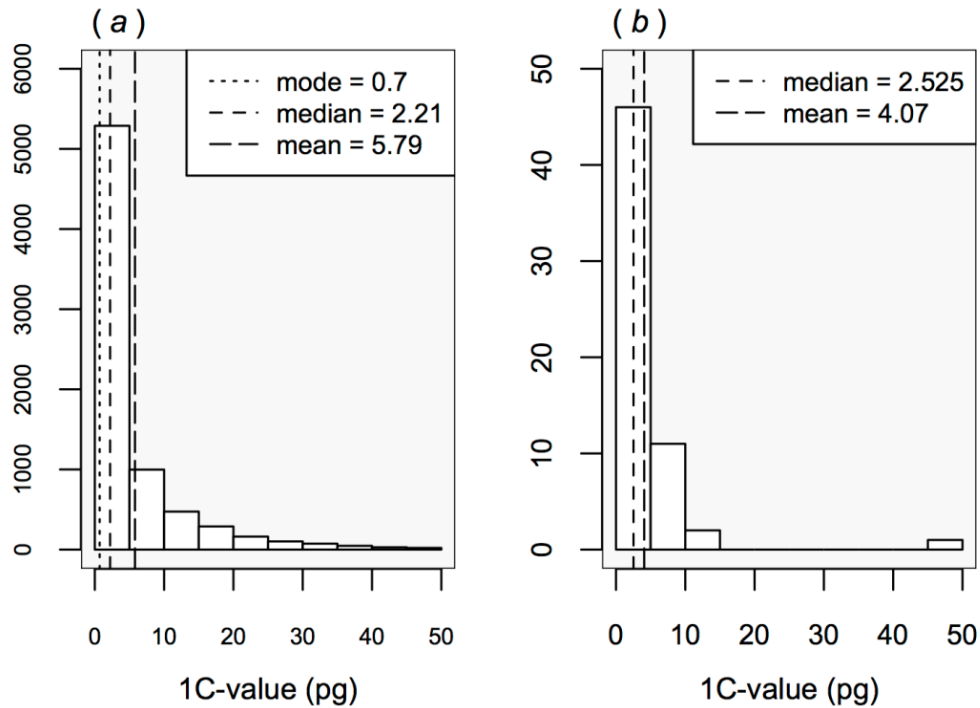

**Fig. S1** Distribution of GS for (a) 7,484 angiosperms across 248 families, for species with 1C-values  $\leq 50$  pg. The mode, median and mean 1C-values (pg) for all 7,542 angiosperms listed in Bennett & Leitch (2012) are shown; (b) the 60 angiosperm species from 18 families on Park Grass, which range from 1C = 0.30 pg in *Carex flacca* to 1C = 47.3 pg in *Fritillaria meleagris*. Genome size data in (a) were obtained from: **Bennett MD, Leitch IJ. 2012. Plant DNA C-values database, release 6.0, December 2012.** URL <http://data.kew.org/cvalues>.

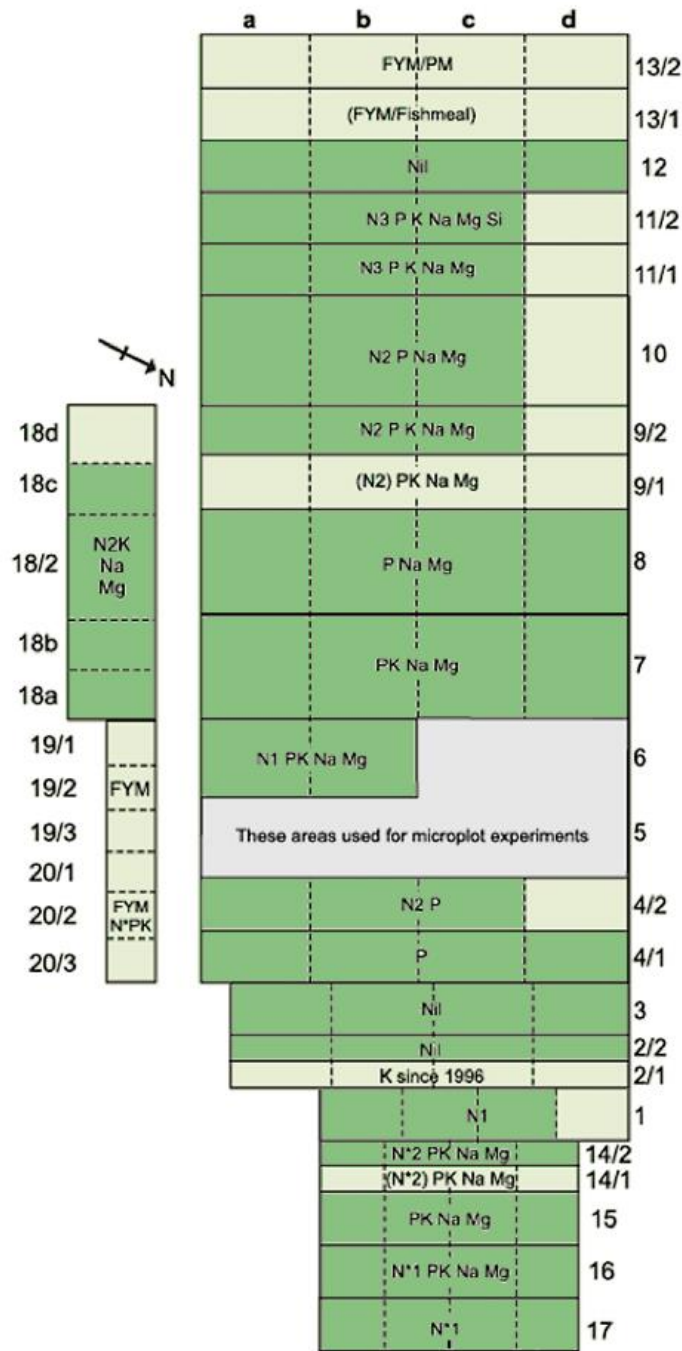

**Fig. S2** Plot layout at Park Grass Experiment with fertilizer treatments (as it was when the herbage samples used in this paper were collected). We sampled 64 subplots, highlighted in dark green; these are subplots where macronutrient treatments have remained constant for at least a century. On these subplots, 15 combinations of N, P, K, Na, Mg, and Si are applied. Abbreviations are as follows: N,

$(\text{NH}_4)_2\text{SO}_4$ ;  $\text{N}^*$ ,  $\text{NaNO}_3$ ; where 1, 2 and 3 correspond to 48, 96 and 144 kg of N applied  $\text{ha}^{-1} \text{yr}^{-1}$ , respectively. The other nutrients are applied annually at the following dosages: P, 35  $\text{kg ha}^{-1}$ ; K, 225  $\text{kg ha}^{-1}$ ; Na, 15  $\text{kg ha}^{-1}$ ; Mg, 10  $\text{kg ha}^{-1}$  (Na and Mg always added together); and Si, 450  $\text{kg ha}^{-1}$ . Abbreviations are as follows: P,  $\text{P}_2\text{O}_5$ ; K,  $\text{K}_2\text{SO}_4$ ; Mg,  $\text{MgSO}_4$ ; Na,  $\text{Na}_2\text{SO}_4$ , Si,  $\text{Na}_2\text{O}_3\text{Si}$ . Two control plots receiving no nutrient treatments were established in 1856 (plots 3 and 12) and a third one (plot 2/2) was established in 1864. In 1903 most of the plots were divided into two to test the effects of lime ( $\text{CaCO}_3$ , 4  $\text{t ha}^{-1}$ ) applied every 4 yr to the southern halves. In 1965 the plots were divided again into four smaller subplots (a–d), with subplots (a), (b) and (c) receiving lime, every 3 yr, to maintain the soil pH at 7, 6, and 5 respectively. The fourth subplot (d) remains unlimed and soil pH here varies from pH 3.6 (on subplots receiving N as  $(\text{NH}_4)_2\text{SO}_4$ ) to pH 5.7 (on subplots receiving N as  $\text{NaNO}_3$ ); control plots (receiving no treatments) are at c. pH 5.1. The herbage on each plot is cut annually in mid–late June and again in autumn. The plots were originally cut by scythe, then by horse-drawn and then tractor-drawn mowers. Yields were originally estimated by weighing the produce from the whole plot, either as hay (1st harvest) or green crop (2nd harvest), and dry matter determined. Since 1960, yields of dry matter have been estimated from strips cut with a forage harvester. However, for the first cut the remainder of each plot is still mown and made into hay, continuing earlier management and ensuring the return of seed. For the second cut, the whole of each plot is cut with a forage harvester. For more information on the Park Grass Experiment and recent changes in fertilizer treatments, see <http://www.era.rothamsted.ac.uk/index.php?area=home&page=index&dataset=1>.

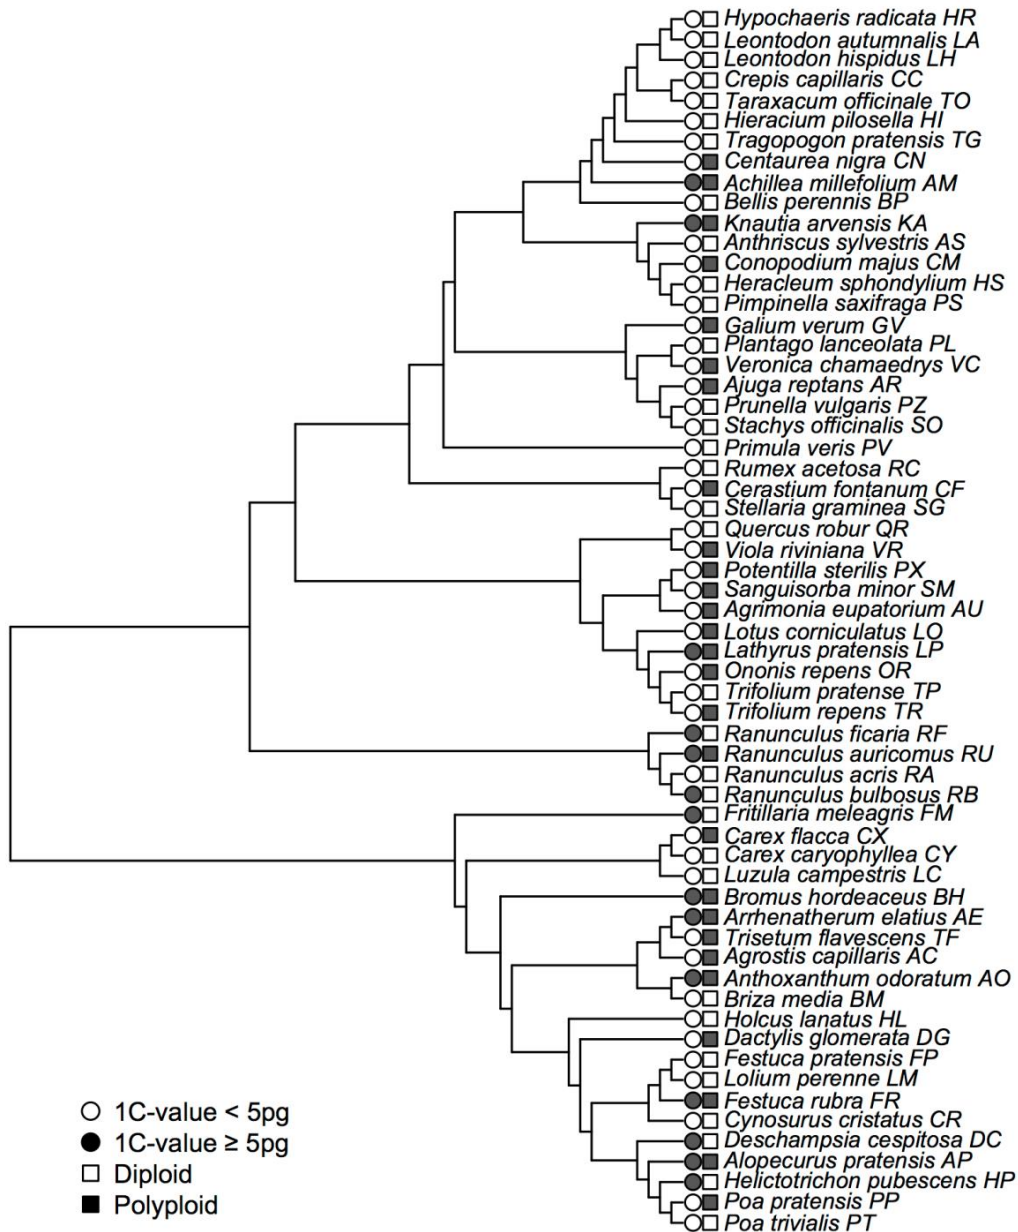

**Fig. S3** Maximum likelihood phylogenetic tree of 60 angiosperm species present at the Park Grass experimental plots which was used to obtain a covariance matrix for fitting linear regressions, phylogenetic independent contrasts and phylogenetic generalised linear mixed effect models. Taxa abbreviations are given next to the full taxa name. Taxon markers show whether the 1C-value < 5 pg, or ≥ 5 pg; and whether a taxon is diploid or polyploid. See also Methods S1.

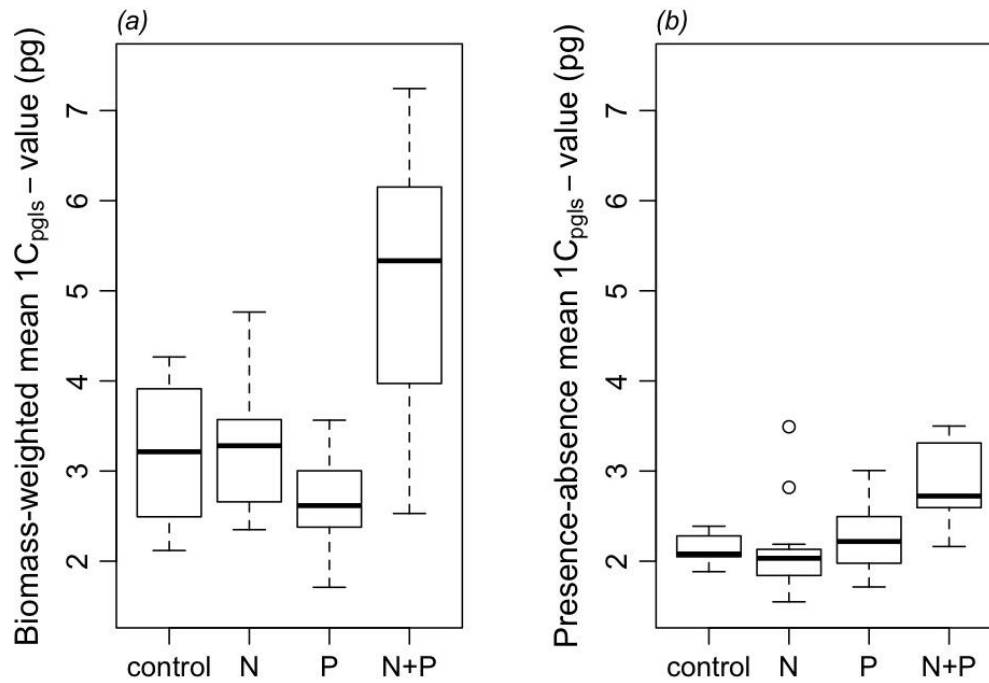

**Fig. S4** Boxplots showing (a) biomass-weighted mean  $1C_{pgls}$ -values (i.e. phylogeny-adjusted GS weighted by species biomass); (b) presence-absence mean  $1C_{pgls}$ -values (i.e. phylogeny-adjusted GS unweighted by biomass). See also legend to Table S4. *pgls*, phylogenetic generalised least squares.

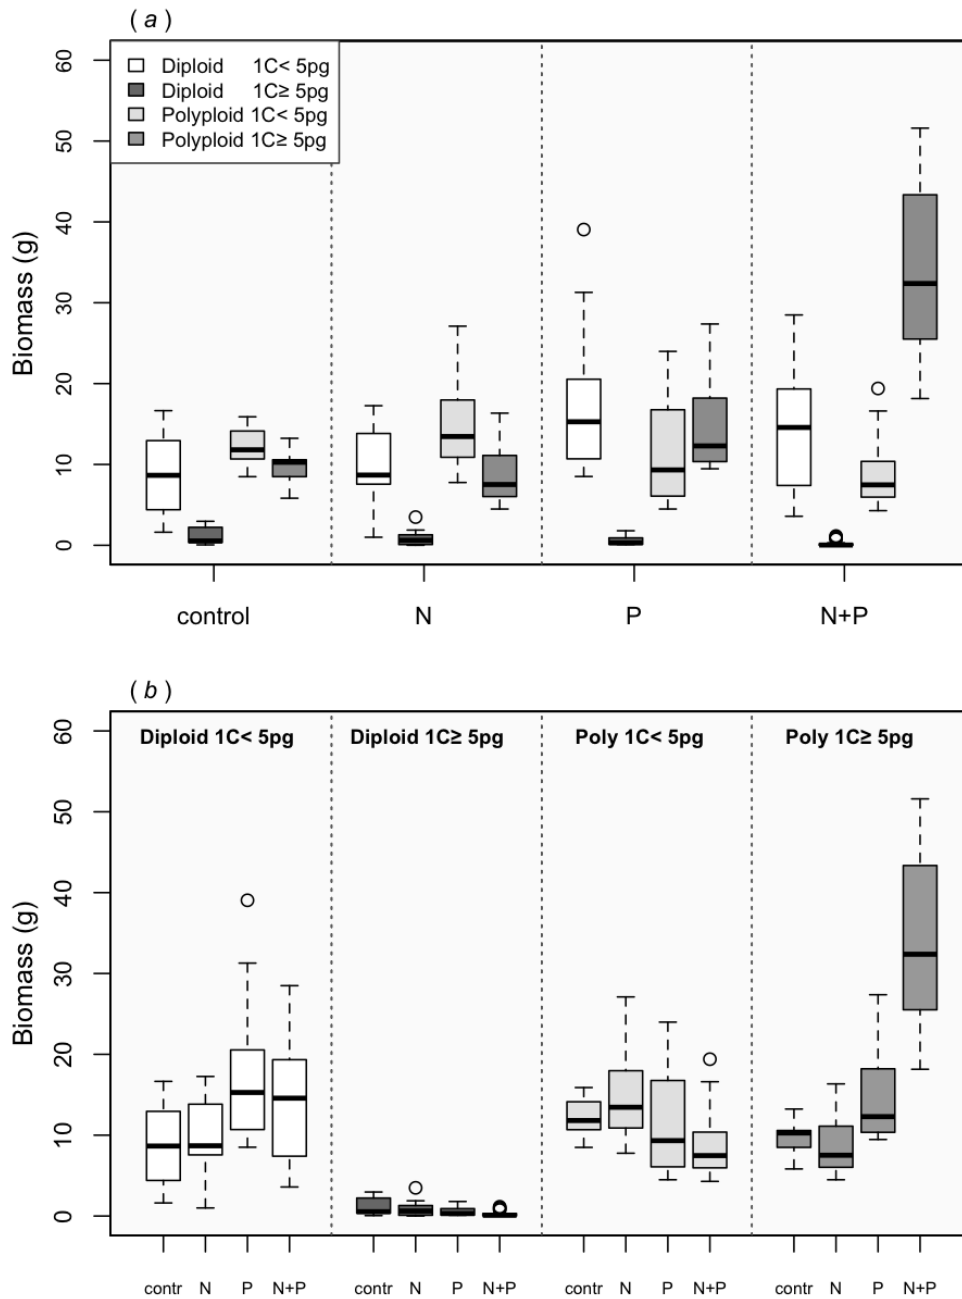

**Fig. S5** Boxplots are shown here to facilitate comparison between the four genomic groups of: diploid taxa with small GS (1C-value < 5 pg); diploid taxa with large GS (1C-value ≥ 5 pg); polyploids with small GS; and polyploids with large GS; their mean total biomass is shown in boxplots by (a) treatment, and (b) by genomic group. contr, control (i.e. no nutrients); Poly, polyploids.



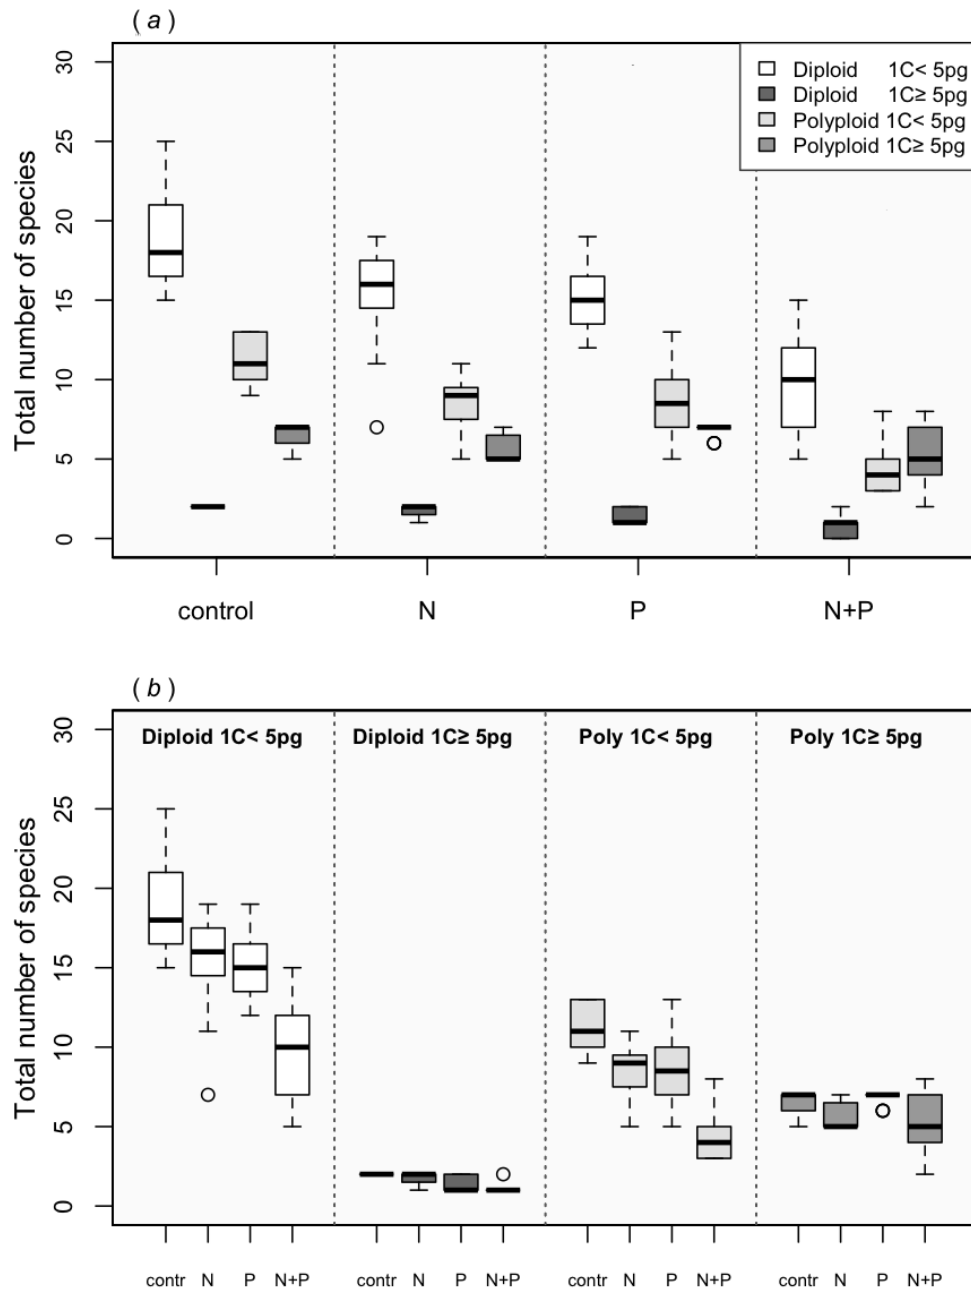

**Fig. S6** Boxplots show the comparisons between the four genomic groups of: diploid taxa with small GS (1C-value < 5 pg); diploid taxa with large GS (1C-value ≥ 5 pg); polyploids with small GS; and polyploids with large GS; the total number of species is shown in boxplots by (a) treatment, and (b) by genomic group. contr, control (i.e. no nutrients); Poly, polyploids.

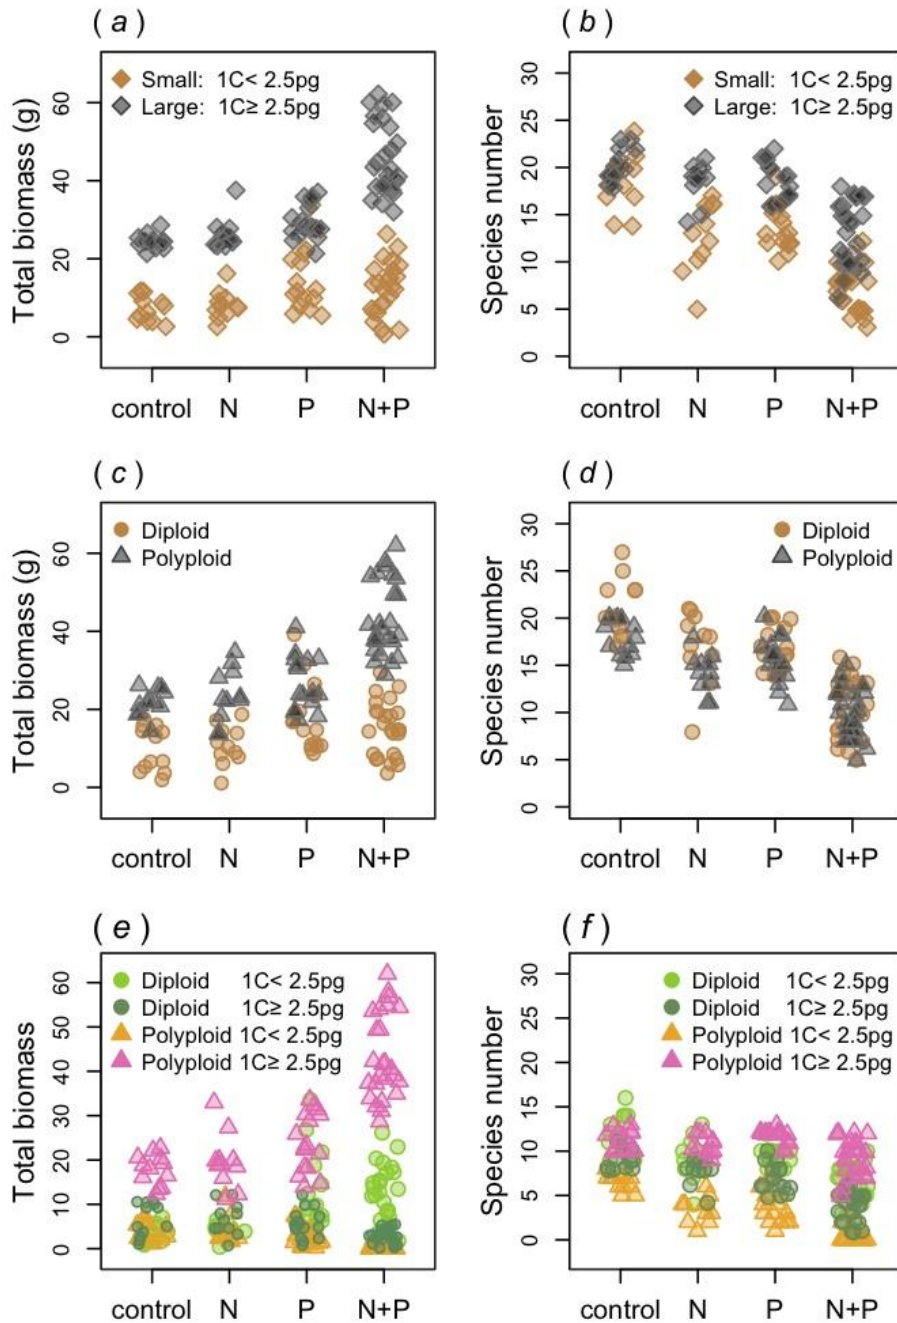

**Fig. S7** Large GS  $\geq 2.5$  pg. Scatter plots comparing total biomass and species numbers between taxa with (a, b) small vs large GS; (c, d) diploid vs polyploid taxa; and (e, f) the four groups based on GS and ploidy level: diploid taxa with small GS (1C-value < 2.5 pg); diploid taxa with large GS (1C-value  $\geq 2.5$  pg); polyploids with small GS; and polyploids with large GS. See also Tables S7 and S8.

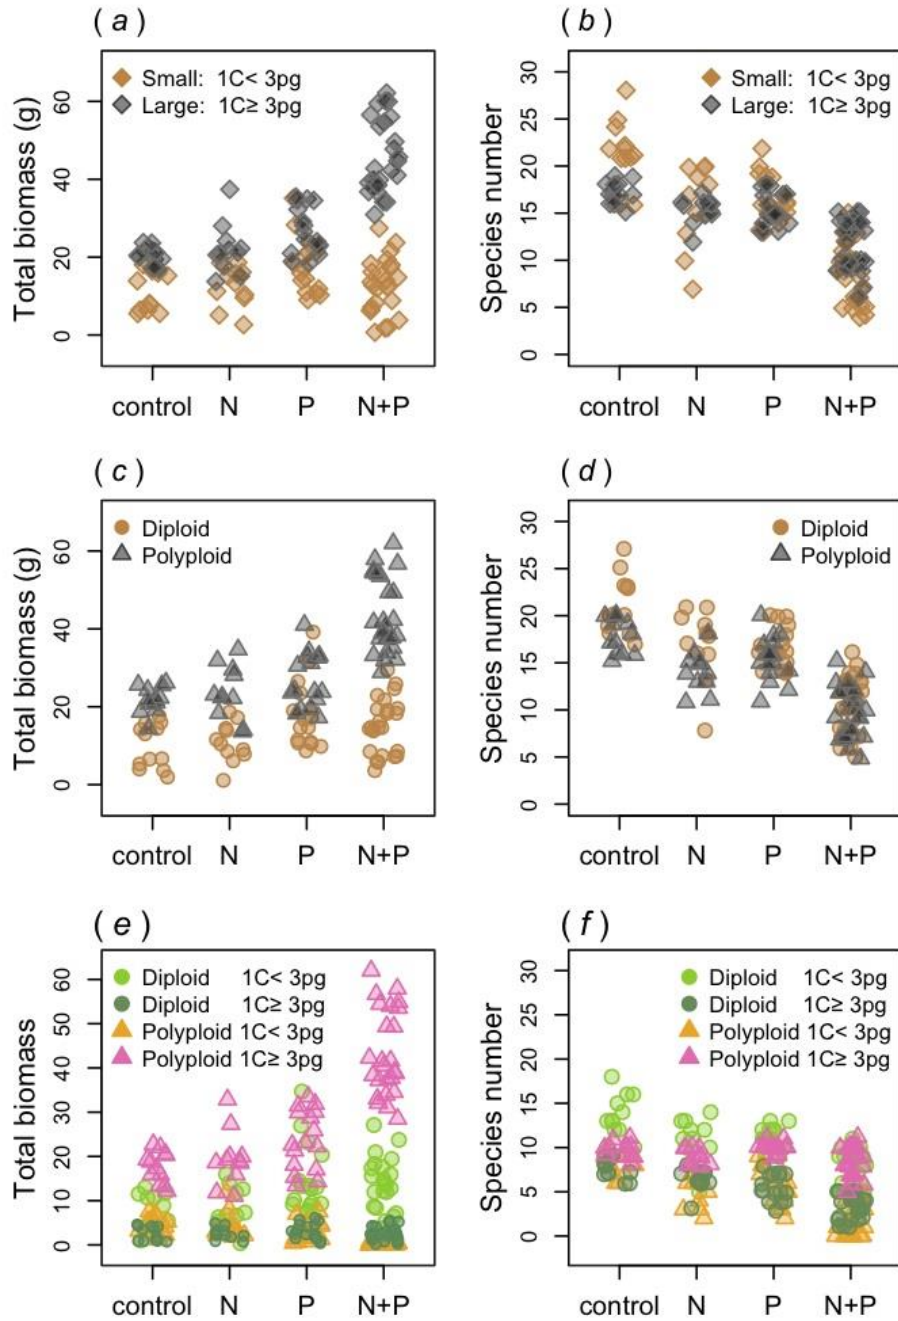

**Fig. S8** Large GS  $\geq 3$  pg. Scatter plots comparing total biomass and species numbers between taxa with (a), (b) small vs large GS; (c), (d) diploid vs polyploid taxa; and (e), (f) the four groups based on GS and ploidy level: diploid taxa with small GS (1C-value < 3 pg); diploid taxa with large GS (1C-value  $\geq 3$  pg); polyploids with small GS; and polyploids with large GS. See also Tables S9 and S10.

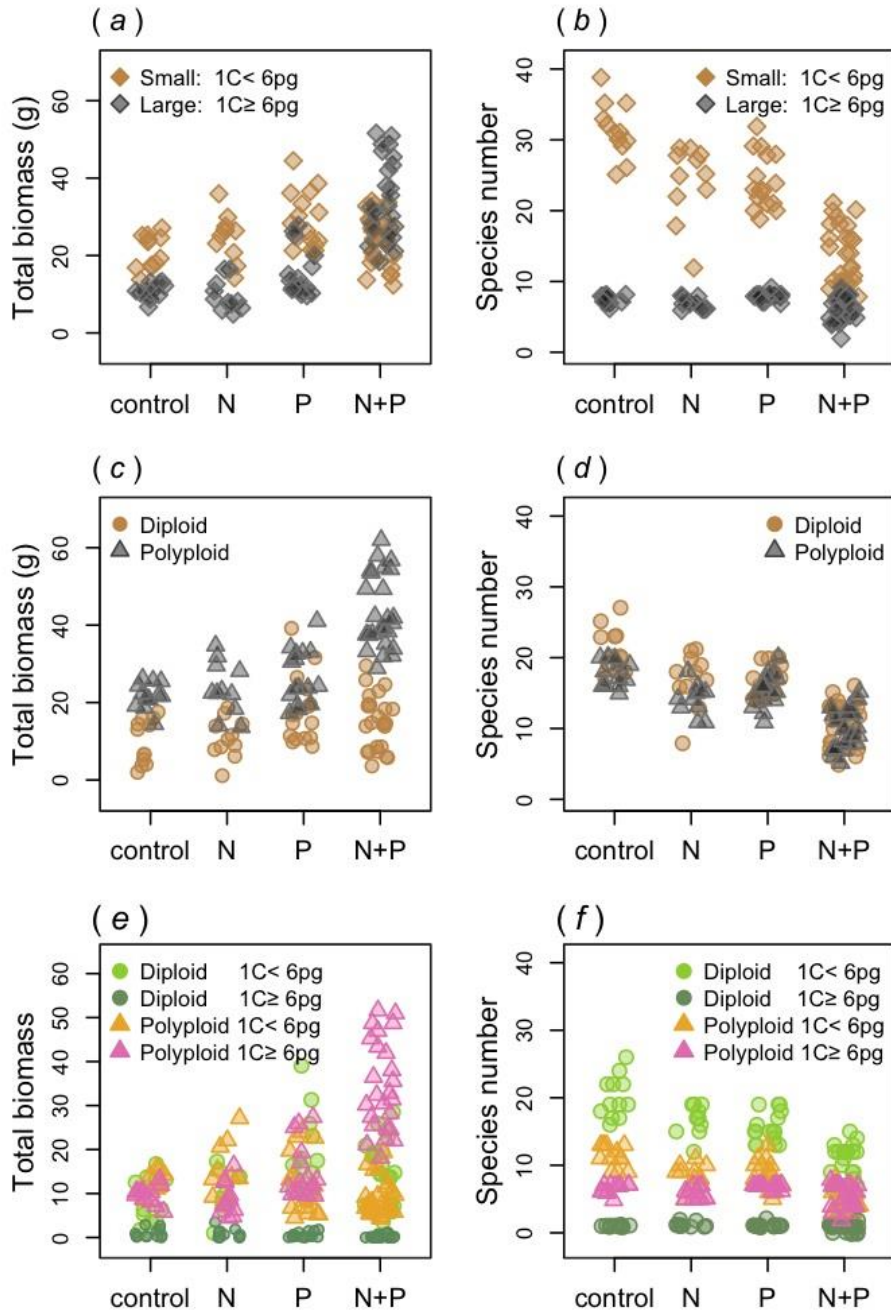

**Fig. S9** Large GS  $\geq 6$  pg. Scatter plots comparing total biomass and species numbers between taxa with (a, b) small vs large GS; (c, d) diploid vs polyploid taxa; and (e, f) the four groups based on GS and ploidy level: diploid taxa with small GS (1C-value  $< 6$  pg); diploid taxa with large GS (1C-value  $\geq 6$  pg); polyploids with small GS; and polyploids with large GS. See also Tables S11 and S12.

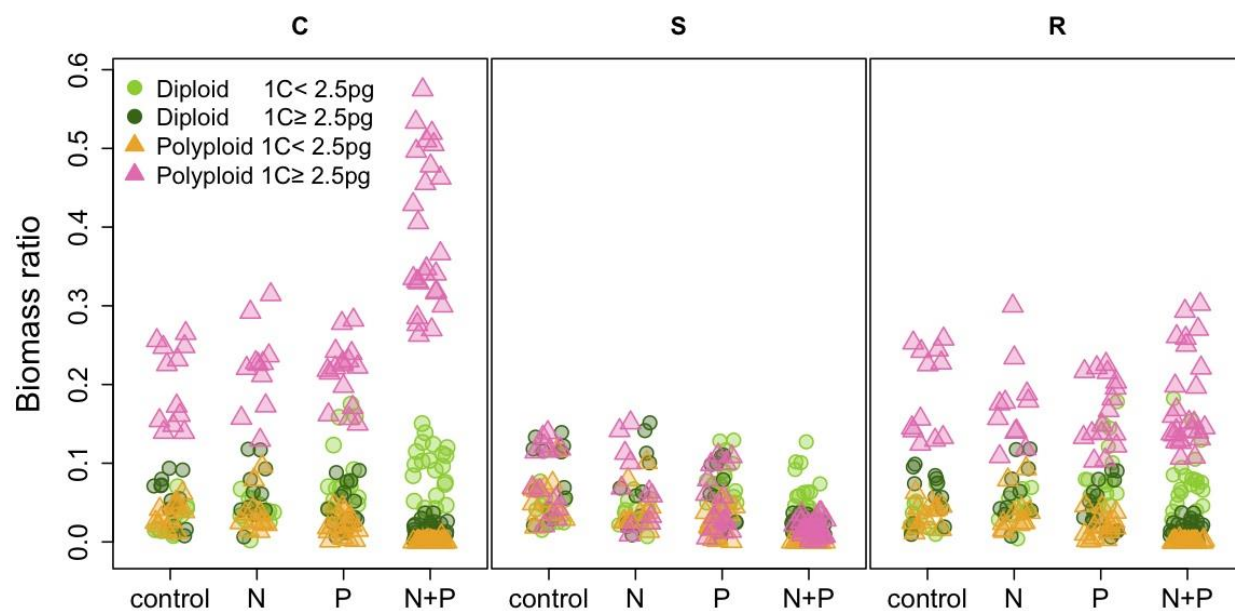

**Fig. S10** Large GS  $\geq 2.5$  pg. Species above-ground biomass weighted by C-S-R strategy (C, competitor; S, stress-tolerant; R, ruderal). Each subplot is represented by four points corresponding to the four genomic parameter groups: diploids 1C-value  $< 2.5$ pg; diploids 1C-value  $\geq 2.5$ pg; polyploids 1C-value  $< 2.5$ pg; and polyploids 1C-value  $\geq 2.5$ pg. Polyploids with GS  $> 2.5$ pg were absent from 18 out of 24 N + P subplots (biomass ratio = 0). See also Tables S7 and S8.

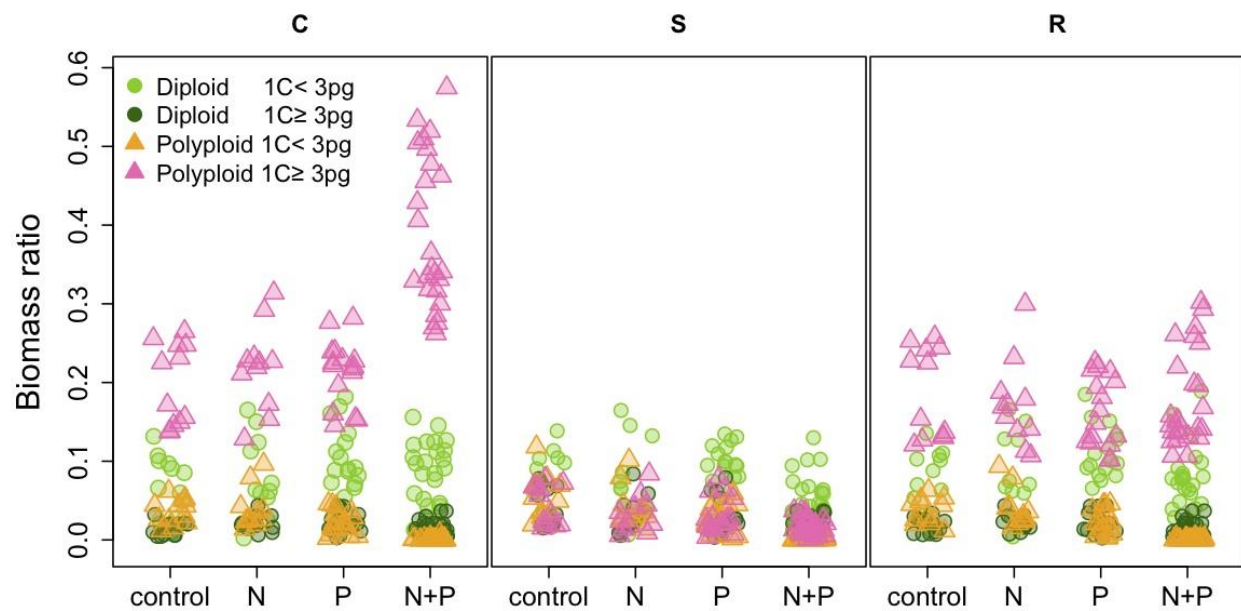

**Fig. S11** Large GS  $\geq 3$  pg. Species biomass weighted by C-S-R strategy (C, competitor; S, stress-tolerant; R, ruderal), with a 3 pg threshold grouping taxa with large GS. Polyploids with GS  $\geq 3$  pg were absent from nine out of 24 N + P subplots (biomass ratio = 0). See also Tables S9 and S10.

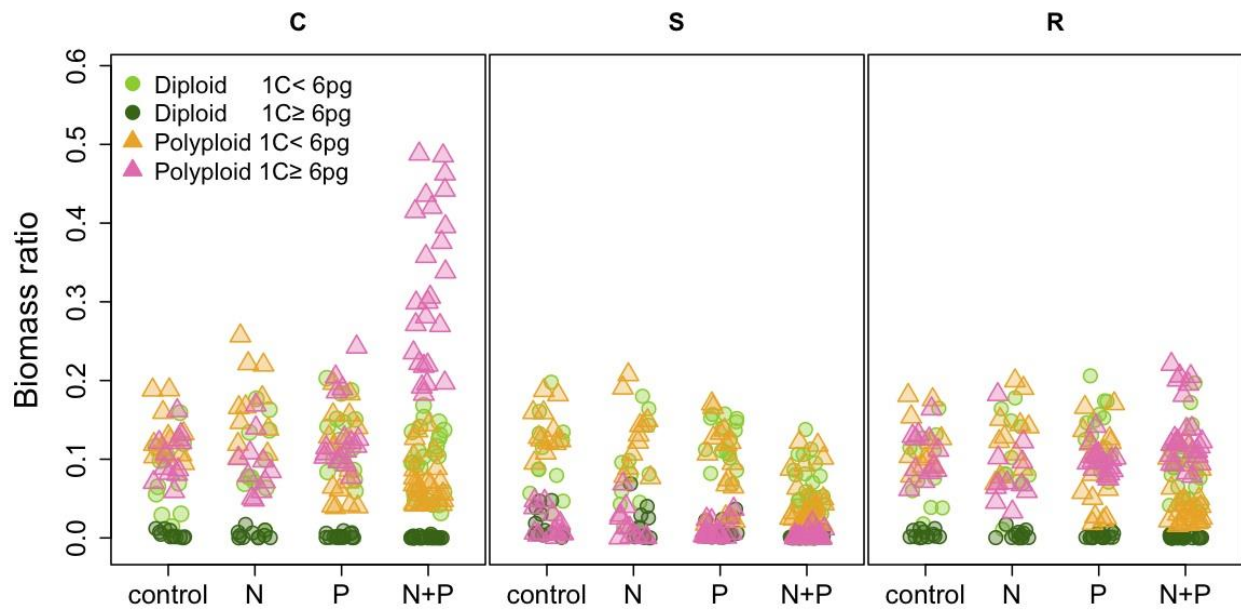

**Fig. S12** Large GS threshold  $\geq 6\text{pg}$ : species biomass weighted by C-S-R strategy (C, competitor; S, stress-tolerant; R, ruderal), where the large GS threshold is set at 6 pg: diploids 1C-value  $< 6\text{pg}$ ; diploids 1C-value  $\geq 6\text{pg}$ ; polyploids 1C-value  $< 6\text{pg}$ ; and polyploids 1C-value  $\geq 6\text{pg}$ . Diploids with GS  $\geq 6\text{pg}$  were absent from seven N + P subplots. (biomass ratio = 0). See also Tables S11 and S12.

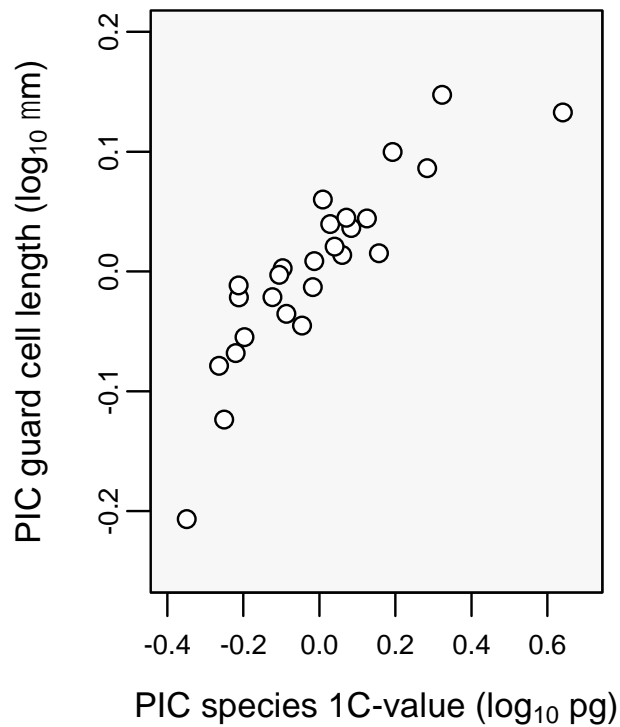

**Fig. S13** Phylogeny-independent contrasts (PIC) on mean guard cell length and 1C-value in 27 taxa collected from the Park Grass Experiment plots.  $R^2 = 0.761$ ,  $F(1, 25) = 79.702$ ,  $P < 0.00001$ . Leaf imprints were made with clear varnish on fresh mature leaves and mounted on microscope slides. The length of 30 guard cells from leaves of two to 11 plants of each species were measured using OpenLab software and mean length estimated. Cell length and GS were  $\log_{10}$  transformed and the association between PICs of guard cell sizes and PICs of 1C-values were tested in a linear regression through the origin with 10,000 permutations (functions *pic* and *Imorigin* from the *ape* package, Paradis *et al.* 2004).



**Table S1** Full list of species occurring in the 64 subplots analysed at Park Grass together with family and the accession numbers of the sequences obtained from NCBI's GenBank to estimate a phylogenetic tree

| ID | Species                         | Family          | matK       | rbcl       | trnF-trnL  | trnT-trnL  | atpF-atpH  |
|----|---------------------------------|-----------------|------------|------------|------------|------------|------------|
| AM | <i>Achillea millefolium</i>     | Asteraceae      | HM850607.1 | JX848399.1 | AY603266.1 | -          | FJ395299.1 |
| AU | <i>Agrimonia eupatorium</i>     | Rosaceae        | HM850683.1 | JN891277.1 | -          | GQ384718.1 | FJ395318.1 |
| AC | <i>Agrostis capillaris</i>      | Poaceae         | JN895337.1 | JN891522.1 | EU119354.1 | AY450936.1 | FJ395329.1 |
| AR | <i>Ajuga reptans</i>            | Lamiaceae       | AY840130.1 | U32163.1   | HQ911712.1 | -          | -          |
| AP | <i>Alopecurus pratensis</i>     | Poaceae         | HM850564.1 | HM849759.1 | EU434101.1 | -          | EU434165.1 |
| AO | <i>Anthoxanthum odoratum</i>    | Poaceae         | HM850562.1 | HM849780.1 | EF137590.1 | -          | FJ395289.1 |
| AS | <i>Anthriscus sylvestris</i>    | Apiaceae        | U58547.1   | JN893702.1 | -          | -          | FJ395283.1 |
| AE | <i>Arrhenatherum elatius</i>    | Poaceae         | EU434292.1 | AY395529.1 | -          | DQ336866.1 | FJ766100.1 |
| BP | <i>Bellis perennis</i>          | Asteraceae      | HM850613.1 | AY395530.1 | JN315894.1 | -          | -          |
| BM | <i>Briza media</i>              | Poaceae         | JN894143.1 | AJ746285.1 | DQ631446.1 | DQ631512.1 | -          |
| BH | <i>Bromus hordeaceus</i>        | Poaceae         | HM850582.1 | HM849826.1 | EU036174.1 | EU036148.1 | GQ247913.1 |
| CY | <i>Carex caryophylla</i>        | Cyperaceae      | JN895022.1 | JN892138.1 | EU288430.1 | -          | -          |
| CX | <i>Carex flacca</i>             | Cyperaceae      | JN895262.1 | JN891463.1 | DQ998968.1 | -          | -          |
| CN | <i>Centaurea nigra</i>          | Asteraceae      | JN895499.1 | JN893384.1 | -          | -          | FJ395314.1 |
| CF | <i>Cerastium fontanum</i>       | Caryophyllaceae | HM850786.1 | HM849881.1 | AY521370.1 | -          | FJ395279.1 |
| CM | <i>Conopodium majus</i>         | Apiaceae        | JN895810.1 | JN893624.1 | -          | -          | -          |
| CC | <i>Crepis capillaris</i>        | Asteraceae      | JN895402.1 | JN892652.1 | -          | -          | -          |
| CR | <i>Cynosurus cristatus</i>      | Poaceae         | HM850529.1 | EF125151.1 | EF137599.1 | -          | -          |
| DG | <i>Dactylis glomerata</i>       | Poaceae         | HM850569.1 | AY395535.1 | AF533028.1 | DQ631481.1 | FJ395298.1 |
| DC | <i>Deschampsia cespitosa</i>    | Poaceae         | JN894900.1 | JX848495.1 | AY237914.1 | DQ631507.1 | FJ395310.1 |
| FP | <i>Festuca pratensis</i>        | Poaceae         | HM850535.1 | JN891048.1 | -          | GU726883.1 | -          |
| FR | <i>Festuca rubra</i>            | Poaceae         | HQ593297.1 | JN891471.1 | -          | DQ336857.1 | FJ395301.1 |
| FM | <i>Fritillaria meleagris</i>    | Liliaceae       | AY624445.1 | AY395537.1 | -          | -          | -          |
| GV | <i>Galium verum</i>             | Rubiaceae       | JN893877.1 | JN892891.1 | -          | -          | HQ594712.1 |
| HP | <i>Helictotrichon pubescens</i> | Poaceae         | JN895846.1 | JN891447.1 | -          | DQ631526.1 | -          |
| HS | <i>Heracleum sphondylium</i>    | Apiaceae        | JN894476.1 | JN893491.1 | -          | AM998530.1 | FJ395304.1 |
| HI | <i>Hieracium pilosella</i>      | Asteraceae      | HE970711.1 | JN891685.1 | DQ460865.1 | -          | HQ594728.1 |
| HL | <i>Holcus lanatus</i>           | Poaceae         | JN894527.1 | JN892327.1 | EF137606.1 | DQ631503.1 | FJ395300.1 |
| HR | <i>Hypochaeris radicata</i>     | Asteraceae      | HM850666.1 | HM850069.1 | AF528380.1 | -          | FJ395296.1 |
| KA | <i>Knautia arvensis</i>         | Dipsacaceae     | JN895237.1 | JN892433.1 | FJ640666.1 | -          | -          |
| LP | <i>Lathyrus pratensis</i>       | Fabaceae        | JX505811.1 | JN891335.1 | JX505683.1 | -          | -          |
| LA | <i>Leontodon autumnalis</i>     | Asteraceae      | JN895402.1 | JN892652.1 | AF528391.1 | -          | -          |
| LH | <i>Leontodon hispidus</i>       | Asteraceae      | JN894007.1 | JN890753.1 | JQ041846.1 | -          | -          |
| LM | <i>Lolium perenne</i>           | Poaceae         | HM850533.1 | JN893059.1 | EU119376.1 | DQ367404.1 | FJ766122.1 |
| LO | <i>Lotus corniculatus</i>       | Fabaceae        | HM049505.1 | JN892127.1 | -          | -          | HQ594766.1 |
| LC | <i>Luzula campestris</i>        | Juncaceae       | JN895446.1 | HM850146.1 | AY437943.1 | -          | FJ395316.1 |
| OR | <i>Ononis repens</i>            | Fabaceae        | JN895637.1 | JN890867.1 | -          | -          | -          |
| PS | <i>Pimpinella saxifraga</i>     | Apiaceae        | FR865050.1 | JN892078.1 | -          | -          | -          |

|    |                             |                 |            |            |            |            |            |
|----|-----------------------------|-----------------|------------|------------|------------|------------|------------|
| PL | <i>Plantago lanceolata</i>  | Plantaginaceae  | HE966968.1 | JN893615.1 | EU036272.1 | -          | GQ248030.1 |
| PP | <i>Poa pratensis</i>        | Poaceae         | JN966444.1 | JN965752.1 | -          | JF904790.1 | FJ395325.1 |
| PT | <i>Poa trivialis</i>        | Poaceae         | HM850517.1 | JN893080.1 | AY327795.1 | -          | FJ395264.1 |
| PX | <i>Potentilla sterilis</i>  | Rosaceae        | JN895651.1 | JN893010.1 | FN561732.1 | -          | -          |
| PV | <i>Primula veris</i>        | Primulaceae     | JN896058.1 | AF394982.1 | JQ927136.1 | -          | -          |
| PZ | <i>Prunella vulgaris</i>    | Lamiaceae       | HM850805.1 | AY395556.1 | AY506619.1 | -          | -          |
| QR | <i>Quercus robur</i>        | Fagaceae        | JN895518.1 | FN675735.1 | HM770040.1 | -          | -          |
| RA | <i>Ranunculus acris</i>     | Ranunculaceae   | JN894744.1 | JN965795.1 | -          | -          | FJ395343.1 |
| RU | <i>Ranunculus auricomus</i> | Ranunculaceae   | JN894692.1 | JN893758.1 | -          | -          | -          |
| RB | <i>Ranunculus bulbosus</i>  | Ranunculaceae   | HM851057.1 | JN892326.1 | FJ490812.1 | -          | FJ395281.1 |
| RF | <i>Ranunculus ficaria</i>   | Ranunculaceae   | AY954232.1 | EU053919.1 | -          | -          | -          |
| RC | <i>Rumex acetosa</i>        | Polygonaceae    | JN895619.1 | JN893396.1 | AJ583853.1 | -          | FJ395278.1 |
| SM | <i>Sanguisorba minor</i>    | Rosaceae        | HM850691.1 | JN892329.1 | EU873351.1 | -          | -          |
| SO | <i>Stachys officinalis</i>  | Lamiaceae       | JN896053.1 | HE963693.1 | FJ854224.1 | -          | -          |
| SG | <i>Stellaria graminea</i>   | Caryophyllaceae | JN895064.1 | JN892194.1 | AY521345.1 | -          | -          |
| TO | <i>Taraxacum officinale</i> | Asteraceae      | FJ395377.1 | JX520956.1 | EF015611.1 | -          | FJ395276.1 |
| TG | <i>Tragopogon pratensis</i> | Asteraceae      | JN893953.1 | JN890681.1 | JQ041858.1 | JQ041828.1 | FJ395355.1 |
| TP | <i>Trifolium pratense</i>   | Fabaceae        | JN895372.1 | JN893083.1 | JQ041859.1 | -          | FJ395288.1 |
| TR | <i>Trifolium repens</i>     | Fabaceae        | HE967014.1 | JN892960.1 | AB546814.1 | -          | FJ395344.1 |
| TF | <i>Trisetum flavescens</i>  | Poaceae         | JN895340.1 | JN893258.1 | DQ336850.1 | DQ336877.1 | -          |
| VC | <i>Veronica chamaedrys</i>  | Plantaginaceae  | JN894843.1 | JN891876.1 | AF486377.1 | -          | -          |
| VR | <i>Viola riviniana</i>      | Violaceae       | JN894328.1 | JN893557.1 | -          | -          | -          |

**Table S2** Full list of taxa occurring at Park Grass with GS (1C-values), chromosome number (2n), ploidy level (x), and C-S-R type, organized according to genomic grouping: diploids with 1C-value < 5pg, diploids with 1C-value ≥ 5pg, polyploids with 1C-value < 5pg, and polyploids with 1C-value ≥ 5pg. Where GS estimates were obtained for the present work, the SD is given together with the mean coefficient of variation (CoV, %) for the flow histogram peaks of both the target taxon and the internal standard. The number of plants we sampled to estimate GS are listed under the column heading (*n*). Other GS estimates were taken from Bennett & Leitch (2012) and are listed in the “Ref” column; see below this table for the authors. Where our CoV was high (e.g. >4), and if available, we used a previously published C-value that was closest to ours, and give our 1C-value estimate in the SD column (along with the SD). Overall, our dataset comprises: 29 diploid species with small GS (1C < 5 pg) (three monocot and nine eudicot families); 5 diploid species with big GS (1C ≥ 5 pg) (two monocot and one eudicot family); 17 polyploid species with small GS (two monocot and eight eudicot families); and nine polyploid species with big GS (one monocot and four eudicot families). Chrom num, chromosome number. na, not applicable.

| ID                          | Species                      | Family      | 1C-value (pg) | 1C-value SD | Mean CoV of target taxon | Mean CoV of internal standard | <i>n</i> | Chrom num (2n) | Ploidy level (x) | CSR type | *Ref |
|-----------------------------|------------------------------|-------------|---------------|-------------|--------------------------|-------------------------------|----------|----------------|------------------|----------|------|
| <b>Diploid 1C &lt; 5 pg</b> |                              |             |               |             |                          |                               |          |                |                  |          |      |
| AS                          | <i>Anthriscus sylvestris</i> | Apiaceae    | 2.25          | 2.18 ±0.04  | 5.27 ±1.11               | 2.32 ±0.24                    | 3        | 16             | 2                | C/CR     | 2    |
| B                           | <i>Briza media</i>           | Poaceae     | 3.35          | 0.07        | 2.29 ±0.97               | 2.43 ±0.86                    | 19       | na             | 2                | S/CSR    | -    |
| BP                          | <i>Bellis perennis</i>       | Asteraceae  | 1.15          | -           | -                        | -                             | -        | 18             | 2                | R/CSR    | 13   |
| CC                          | <i>Crepis capillaris</i>     | Asteraceae  | 2.10          | -           | -                        | -                             | -        | 6              | 2                | R/SR     | 7    |
| C                           | <i>Conopodium majus</i>      | Apiaceae    | 0.83          | 0.02        | 4.15 ±0.5                | 2.74 ±0.44                    | 6        | 22             | 2                | SR       | -    |
| CR                          | <i>Cynosurus cristatus</i>   | Poaceae     | 3.05          | -           | -                        | -                             | -        | 14             | 2                | R/CSR    | 18   |
| CY                          | <i>Carex caryophyllea</i>    | Cyperac.    | 0.78          | -           | -                        | -                             | -        | 66             | 2                | S/CSR    | 11   |
| FP                          | <i>Festuca pratensis</i>     | Poaceae     | 2.23          | -           | -                        | -                             | -        | 14             | 2                | CSR      | 16   |
| HI                          | <i>Hieracium pilosella</i>   | Asteraceae  | 3.53          | 0.06        | 2.8 ±0.31                | 2.59 ±0.67                    | 8        | 18             | 2                | S/CSR    | -    |
| HL                          | <i>Holcus lanatus</i>        | Poaceae     | 1.89          | 0.12        | 2.48 ±0.67               | 2.16 ±0.54                    | 50       | 14             | 2                | CSR      | -    |
| HR                          | <i>Hypochaeris radicata</i>  | Asteraceae  | 1.34          | -           | -                        | -                             | -        | 8              | 2                | CSR      | 6    |
| HS                          | <i>Heracleum sphondylium</i> | Apiaceae    | 2.19          | 2.56 ±0.13  | 3.42 ±0.80               | 2.78 ±0.18                    | 2        | 22             | 2                | C/CSR    | 17   |
| LA                          | <i>Leontodon autumnalis</i>  | Asteraceae  | 1.16          | -           | -                        | -                             | -        | 12             | 2                | R/CSR    | 17   |
| LC                          | <i>Luzula campestris</i>     | Juncaceae   | 0.43          | 0.02        | 3.89 ±0.77               | 2.62 ±0.76                    | 2        | 12             | 2                | S/CSR    | -    |
| LH                          | <i>Leontodon hispidus</i>    | Asteraceae  | 2.50          | 0.07        | 4.51 ±0.09               | 2.17 ±0.1                     | 2        | 14             | 2                | CSR      | 5    |
| LM                          | <i>Lolium perenne</i>        | Poaceae     | 3.06          | 0.03        | 3.23 ±0.3                | 3.12 ±0.17                    | 3        | 14             | 2                | CR/CSR   | -    |
| PL                          | <i>Plantago lanceolata</i>   | Plantagin.  | 1.20          | -           | 4.09 ±NA                 | 3.51 ±NA                      | 1        | 12             | 2                | CSR      | 11   |
| PS                          | <i>Pimpinella saxifraga</i>  | Apiaceae    | 3.89          | 0.04        | 4.63 ±2.22               | 3.13 ±0.76                    | 3        | 20             | 2                | SR/CSR   | -    |
| PT                          | <i>Poa trivialis</i>         | Poaceae     | 1.85          | 0.03        | 4.17 ±1.15               | 2.72 ±0.94                    | 13       | 14             | 2                | R/CSR    | -    |
| PV                          | <i>Primula veris</i>         | Primula.    | 0.49          | -           | -                        | -                             | -        | 22             | 2                | S/CSR    | 17   |
| PZ                          | <i>Prunella vulgaris</i>     | Lamiaceae   | 0.65          | -           | -                        | -                             | -        | 28             | 2                | CSR      | 23   |
| QR                          | <i>Quercus robur</i>         | Fagaceae    | 0.93          | -           | -                        | -                             | -        | 24             | 2                | SC       | 8    |
| RA                          | <i>Ranunculus acris</i>      | Ranuncul.   | 4.74          | 0.19        | 3.8 ±1.01                | 2.92 ±0.7                     | 21       | 14             | 2                | CSR      | -    |
| RC                          | <i>Rumex acetosa</i>         | Polygon.    | 3.55          | 0.07        | 2.28 ±0.56               | 2.39 ±0.41                    | 7        | 14             | 2                | CSR      | -    |
| SG                          | <i>Stellaria graminea</i>    | Caryophyll. | 1.17          | NA          | 3.13                     | 2.61                          | 1        | 26             | 2                | CSR      | -    |

|                           |                                 |             |       |            |            |            |    |         |       |        |    |
|---------------------------|---------------------------------|-------------|-------|------------|------------|------------|----|---------|-------|--------|----|
| SO                        | <i>Stachys officinalis</i>      | Lamiaceae   | 4.53  | 4.91 ±NA   | 4.19 ±NA   | 3.3 ±NA    | 1  | 16      | 2     | S/CSR  | 2  |
| TG                        | <i>Tragopogon pratensis</i>     | Asteraceae  | 2.77  | 2.53 ±NA   | 4.93 ±NA   | 2.03 ±NA   | 1  | 12      | 2     | CR/CSR | 14 |
| TO                        | <i>Taraxacum officinale</i>     | Asteraceae  | 1.53  | 0.28       | 3.77 ±1.14 | 2.89 ±1    | 18 | 16      | 2     | R/CSR  | -  |
| TP                        | <i>Trifolium pratense</i>       | Fabaceae    | 0.53  | 0.51 ±NA   | 3.17 ±NA   | 2.11 ±NA   | 1  | 14      | 2     | CSR    | 3  |
| <b>Diploid 1C ≥ 5 pg</b>  |                                 |             |       |            |            |            |    |         |       |        |    |
| DC                        | <i>Deschampsia cespitosa</i>    | Poaceae     | 5.22  | -          | -          | -          | -  | 26      | 2     | SC/CSR | 12 |
| F                         | <i>Fritillaria meleagris</i>    | Liliaceae   | 47.30 | -          | -          | -          | -  | 24      | 2     | SR     | 10 |
| HP                        | <i>Helictotrichon pubescens</i> | Poaceae     | 6.28  | -          | -          | -          | -  | 14      | 2     | S/CSR  | 15 |
| RB                        | <i>Ranunculus bulbosus</i>      | Ranuncul.   | 5.63  | -          | -          | -          | -  | 16      | 2     | SR     | 19 |
| RF                        | <i>Ranunculus ficaria</i>       | Ranuncul.   | 9.33  | -          | -          | -          | -  | 16      | 2     | SR     | 20 |
| <b>Polyloid &lt; 5 pg</b> |                                 |             |       |            |            |            |    |         |       |        |    |
| AC                        | <i>Agrostis capillaris</i>      | Poaceae     | 3.53  | -          | -          | -          | 15 | 28      | 4     | CSR    | 11 |
| AR                        | <i>Ajuga reptans</i>            | Lamiaceae   | 1.19  | 0.04       | 3.09 ±0.75 | 2.89 ±0.61 | 9  | 32      | poly  | R/CSR  | -  |
| AU                        | <i>Agrimonia eupatorium</i>     | Rosaceae    | 3.98  | 0.01       | 3.33 ±0.34 | 3.04 ±0.42 | 3  | 28      | poly  | CSR    | -  |
| CF                        | <i>Cerastium fontanum</i>       | Caryophyll. | 2.93  | -          | -          | -          | -  | 144     | 8, 16 | R/CSR  | 4  |
| CN                        | <i>Centaurea nigra</i>          | Asteraceae  | 2.25  | 0.04       | 3.11 ±0.57 | 2.56 ±0.42 | 4  | 44      | poly  | CSR    | -  |
| CX                        | <i>Carex flacca</i>             | Cyperaceae  | 0.30  | -          | -          | -          | -  | 76      | 4     | S/SC   | 9  |
| DG                        | <i>Dactylis glomerata</i>       | Poaceae     | 4.15  | 0.11       | 4.38 ±1.28 | 3.62 ±0.74 | 9  | 28      | 4     | C/CSR  | -  |
| GV                        | <i>Galium verum</i>             | Rubiaceae   | 1.89  | 2.10       | 5.22       | 2.79       | 5  | 44      | 4     | SC/CSR | 23 |
| LO                        | <i>Lotus corniculatus</i>       | Fabaceae    | 1.27  | 0.08       | 3.78 ±0.38 | 3.37 ±1.13 | 24 | 24      | 4     | S/CSR  | -  |
| OR                        | <i>Ononis repens</i>            | Fabaceae    | 1.41  | 0.01       | 4.79 ±0.79 | 3.16 ±0.52 | 6  | various | poly  | SC/CSR | -  |
| PP                        | <i>Poa pratensis</i>            | Poaceae     | 4.90  | 1.08       | 3.33 ±1.12 | 3.46 ±0.9  | 31 | various | poly  | CSR    | -  |
| PX                        | <i>Potentilla sterilis</i>      | Rosaceae    | 0.97  | -          | -          | -          | 1  | 28      | poly  | SR/CSR | -  |
| S                         | <i>Sanguisorba minor</i>        | Rosaceae    | 0.55  | 0.62 ±NA   | 4.85 ±NA   | 2.93 ±NA   | 1  | 28      | 4     | S/CSR  | 9  |
| TF                        | <i>Trisetum flavescens</i>      | Poaceae     | 2.55  | -          | -          | -          | -  | various | poly  | CSR    | 2  |
| TR                        | <i>Trifolium repens</i>         | Fabaceae    | 1.29  | 0.22       | 2.41 ±0.31 | 2.06 ±0.35 | 8  | 32      | 4     | CR/CSR | -  |
| VC                        | <i>Veronica chamaedrys</i>      | Plantagin.  | 1.49  | -          | -          | -          | -  | 32      | 4     | CSR    | 1  |
| VR                        | <i>Viola riviniana</i>          | Violaceae   | 1.35  | -          | -          | -          | -  | 40      | 4     | S/CSR  | 9  |
| <b>Polyloid ≥ 5 pg</b>    |                                 |             |       |            |            |            |    |         |       |        |    |
| AE                        | <i>Arrhenatherum elatius</i>    | Poaceae     | 7.99  | 0.22       | 2.82 ±0.87 | 3.09 ±0.46 | 31 | 28      | 4     | C/CSR  | -  |
| A                         | <i>Achillea millefolium</i>     | Asteraceae  | 8.37  | 0.07       | 3.09 ±0.66 | 2.24 ±0.62 | 49 | 54      | 6     | CSR    | -  |
| AO                        | <i>Anthoxanthum odoratum</i>    | Poaceae     | 6.31  | 0.21       | 2.04 ±0.43 | 2.33 ±0.45 | 67 | 20      | 4     | SR/CSR | -  |
| AP                        | <i>Alopecurus pratensis</i>     | Poaceae     | 6.80  | -          | -          | -          | -  | 28      | 4     | C/CSR  | 13 |
| BH                        | <i>Bromus hordeaceus</i>        | Poaceae     | 11.06 | 0.06       | 2.99 ±0.78 | 2.97 ±0.69 | 5  | 28      | 4     | R/CR   | -  |
| FR                        | <i>Festuca rubra</i>            | Poaceae     | 6.13  | 0.14       | 2.02 ±0.52 | 2.45 ±0.47 | 45 | 42      | 6     | CSR    | -  |
| KA                        | <i>Knautia arvensis</i>         | Dipsaca.    | 7.01  | 7.09 ±0.23 | 3.31 ±0.45 | 2.96 ±0.16 | 10 | 40      | 4     | CSR    | 22 |
| LP                        | <i>Lathyrus pratensis</i>       | Fabaceae    | 11.46 | 0.43       | 3.34 ±0.99 | 3.7 ±0.82  | -  | na      | poly  | CSR    | -  |
| RU                        | <i>Ranunculus auricomus</i>     | Ranuncul.   | 9.00  | -          | -          | -          | -  | 32      | 4     | SR     | 21 |

\*Reference sources for the C-values used in the present work that were taken from the Plant DNA C-values database

(Bennett & Leitch 2012). The database source references were: (1) Albach & Greilhuber (2004) (reference 478); (2) S. R. Band (pers. comm.) (reference 154); (3) Barow & Meister (2003) (reference 492); (4) Bennett et al. (1982) (reference 105); (5) M. A. Callimassia & M. D. Bennett (pers. comm.) (reference 269-H); (6) Cerbah et al. (1999) (reference 666); (7) Evans et al. (1972) (reference 7); (8) Favre & Brown (1996) (reference 366); (9) Grime et al. (1985) (reference 133); (10) Leitch et al. (2007) (reference 565); (11) Mowforth (1986) (reference 158); (12) Murray et al. (2005) (reference 528); (13) Olszewska &

Osiecka (1982) (reference 155); (13) Olszewska & Osiecka (1983) (reference 156); (14) Pires *et al.* (2004) (reference 510); (15) Roser (1995) (reference 283); (16) A. G. Seal (pers. comm.) (reference 72); (17) Siljak-Yakovlev *et al.* (2010) (reference 634); (18) Šmarda *et al.* (2008) (reference 555); (19) Smith & Bennett (1975) (reference 45); (20) Smith & Bennett (1975) (reference 45); (21) Smith & Bennett (1975) (reference 45); (22) Temsch & Greilhuber (2010) (reference 652); (23) Temsch *et al.* (2010) (reference 627).

**Table S3** Measures of arithmetic mean and SD under four different nutrient treatments: (control i.e. no fertilizer); N (N without P); P (P without N); N + P (both N and P applied) on: mean biomass (aboveground dry weight), biomass-weighted mean 1C-value, biomass-weighted mean  $1C_{pgls}$  (phylogenetic least squares); presence-absence (i.e. unweighted by biomass) mean  $1C_{pgls}$ .  $n$ , number of subplots in each treatment.  $1C_{pgls}$  means were  $\log_{10}$  back-transformed to facilitate interpretation.  $1C_{pgls}$  presence-absence are unweighted by biomass. Mean  $1C_{pgls}$  were estimated as in Šmarda *et al.* (2013), using the *gls* function in the *nlme* package (Pinheiro *et al.*, 2013) and the *ape* package (Paradis *et al.*, 2004). *Pgls* accommodates models with phylogenetic correlation structures and we used it to obtain for each subplot a phylogeny-adjusted biomass-weighted mean GS (= ‘biomass-weighted mean  $1C_{pgls}$ -value’) which takes into account each taxon’s contribution to total biomass, and a presence-absence mean which is unweighted by species biomass. We calculated  $1C_{pgls}$  by using the R formula  $\gamma^{-1}$  to estimate subplot means where  $\gamma$  = the 1C-value of each taxon; a within group structure was specified by Brownian motion phylogenetic covariance, and biomass fraction, or presence-absence, described the within-group heteroscedasticity. A phylogenetic tree of 60 species was used to estimate both types of mean  $1C_{pgls}$ -value for each subplot (see Methods S1 for phylogenetic tree file). A biomass value of 0.000001 was attributed to absent species.

| Treatment | $n$ | Total biomass<br>(g) | Spp no.  | Biomass-<br>weighted mean 1C<br>(pg) | Biomass-weighted<br>mean $1C_{pgls}$<br>(pg) | Presence-absence<br>mean $1C_{pgls}$<br>(pg) |
|-----------|-----|----------------------|----------|--------------------------------------|----------------------------------------------|----------------------------------------------|
| Control   | 12  | 31.71 ± 4.27         | 39 ± 4.2 | 3.99 ± 0.37                          | 3.19 ± 0.81                                  | 2.12 ± 0.14                                  |
| N         | 11  | 34.47 ± 3.9          | 31 ± 5.6 | 3.87 ± 0.51                          | 3.24 ± 0.73                                  | 2.13 ± 0.54                                  |
| P         | 16  | 44.49 ± 11.75        | 32 ± 4.2 | 4.17 ± 0.44                          | 2.66 ± 0.5                                   | 2.24 ± 0.36                                  |
| N + P     | 25  | 58.36 ± 11.64        | 20 ± 5.5 | 5.4 ± 0.52                           | 5.07 ± 1.28                                  | 2.81 ± 0.42                                  |

**Table S4** Means and ratios with SD per nutrient treatment for:(a) total subplot biomass; (b) total number of species per subplot, and (c) total C-weighted; (d) total S-weighted; (e) total R-weighted biomass for the four genomic groups of taxa: diploid taxa with small GS; diploid taxa with big GS, polyploid taxa with small GS; and polyploid taxa with big GS. 1C = 1C-value (pg). The number of subplots per treatment is as follows: control = 12, N = 11, P = 16, N + P = 25.

| <b>(a) Mean total biomass (g)</b> |             |            |             |              | <b>Mean ratio total biomass</b> |             |             |             |
|-----------------------------------|-------------|------------|-------------|--------------|---------------------------------|-------------|-------------|-------------|
| Treatment                         | Diploid     | Diploid    | Polyploid   | Polyploid    | Diploid                         | Diploid     | Polyploid   | Polyploid   |
|                                   | 1C< 5pg     | 1C≥ 5pg    | 1C< 5pg     | 1C≥ 5pg      | 1C< 5pg                         | 1C≥ 5pg     | 1C< 5pg     | 1C≥ 5pg     |
| Control                           | 8.78 ±4.95  | 1.15 ±1.1  | 12.06 ±2.41 | 9.72 ±2.02   | 0.267 ±0.14                     | 0.033 ±0.03 | 0.385 ±0.09 | 0.314 ±0.09 |
| N                                 | 9.91 ±4.74  | 0.89 ±1.06 | 14.93 ±6.01 | 8.74 ±3.8    | 0.291 ±0.15                     | 0.027 ±0.03 | 0.425 ±0.13 | 0.257 ±0.12 |
| P                                 | 17.22 ±8.62 | 0.56 ±0.59 | 11.8 ±6.89  | 14.9 ±6.19   | 0.376 ±0.11                     | 0.015 ±0.02 | 0.282 ±0.16 | 0.327 ±0.06 |
| N+P                               | 14.84 ±6.91 | 0.2 ±0.35  | 8.96 ±4.06  | 34.35 ±10.31 | 0.249 ±0.1                      | 0.004 ±0.01 | 0.163 ±0.09 | 0.584 ±0.11 |

  

| <b>(b) Mean total number of species</b> |         |         |           |           | <b>Mean ratio total species number</b> |             |             |             |
|-----------------------------------------|---------|---------|-----------|-----------|----------------------------------------|-------------|-------------|-------------|
| Treatment                               | Diploid | Diploid | Polyploid | Polyploid | Diploid                                | Diploid     | Polyploid   | Polyploid   |
|                                         | 1C< 5pg | 1C≥ 5pg | 1C< 5pg   | 1C≥ 5pg   | 1C< 5pg                                | 1C≥ 5pg     | 1C< 5pg     | 1C≥ 5pg     |
| Control                                 | 19 ±3   | 2 ±0    | 11 ±2     | 7 ±1      | 0.49 ±0.04                             | 0.052 ±0.01 | 0.29 ±0.03  | 0.168 ±0.02 |
| N                                       | 15 ±4   | 2 ±0    | 8 ±2      | 6 ±1      | 0.485 ±0.05                            | 0.056 ±0.02 | 0.268 ±0.02 | 0.191 ±0.05 |
| P                                       | 15 ±2   | 1 ±1    | 9 ±2      | 7 ±0      | 0.476 ±0.03                            | 0.043 ±0.01 | 0.266 ±0.04 | 0.215 ±0.02 |
| N+P                                     | 10 ±3   | 1 ±1    | 4 ±1      | 5 ±2      | 0.48 ±0.05                             | 0.037 ±0.03 | 0.218 ±0.05 | 0.265 ±0.04 |

  

| <b>(c) C-weighted mean total biomass (g)</b> |             |             |             |              | <b>C-weighted mean ratio</b> |             |             |             |
|----------------------------------------------|-------------|-------------|-------------|--------------|------------------------------|-------------|-------------|-------------|
| Treatment                                    | Diploid     | Diploid     | Polyploid   | Polyploid    | Diploid                      | Diploid     | Polyploid   | Polyploid   |
|                                              | 1C< 5pg     | 1C≥ 5pg     | 1C< 5pg     | 1C≥ 5pg      | 1C< 5pg                      | 1C≥ 5pg     | 1C< 5pg     | 1C≥ 5pg     |
| Control                                      | 2.64 ±1.57  | 0.16 ±0.17  | 4.069 ±0.85 | 3.185 ±0.67  | 0.08 ±0.04                   | 0.005 ±0    | 0.13 ±0.03  | 0.103 ±0.03 |
| N                                            | 3.336 ±1.59 | 0.152 ±0.17 | 5.836 ±2.39 | 3.138 ±1.23  | 0.098 ±0.05                  | 0.005 ±0.01 | 0.165 ±0.05 | 0.092 ±0.04 |
| P                                            | 5.819 ±3.37 | 0.092 ±0.1  | 4.361 ±2.45 | 6.294 ±3.90  | 0.125 ±0.04                  | 0.002 ±0    | 0.102 ±0.05 | 0.132 ±0.05 |
| N+P                                          | 5.918 ±3.04 | 0.034 ±0.06 | 4.134 ±1.83 | 19.548 ±9.10 | 0.097 ±0.04                  | 0.001 ±0    | 0.072 ±0.03 | 0.32 ±0.1   |

  

| <b>(d) S-weighted mean total biomass (g)</b> |             |             |             |             | <b>S-weighted mean ratio</b> |             |             |             |
|----------------------------------------------|-------------|-------------|-------------|-------------|------------------------------|-------------|-------------|-------------|
| Treatment                                    | Diploid     | Diploid     | Polyploid   | Polyploid   | Diploid                      | Diploid     | Polyploid   | Polyploid   |
|                                              | 1C< 5pg     | 1C≥ 5pg     | 1C< 5pg     | 1C≥ 5pg     | 1C< 5pg                      | 1C≥ 5pg     | 1C< 5pg     | 1C≥ 5pg     |
| Control                                      | 3.316 ±1.77 | 0.733 ±0.72 | 4.312 ±0.86 | 3.268 ±0.68 | 0.101 ±0.05                  | 0.021 ±0.02 | 0.137 ±0.03 | 0.106 ±0.03 |
| N                                            | 3.068 ±1.63 | 0.589 ±0.71 | 4.574 ±1.86 | 2.793 ±1.29 | 0.091 ±0.05                  | 0.018 ±0.02 | 0.131 ±0.04 | 0.082 ±0.04 |
| P                                            | 5.422 ±2.13 | 0.373 ±0.39 | 3.801 ±2.23 | 4.291 ±1.27 | 0.121 ±0.03                  | 0.01 ±0.01  | 0.092 ±0.05 | 0.097 ±0.02 |
| N + P                                        | 3.718 ±1.72 | 0.136 ±0.23 | 2.416 ±1.41 | 7.342 ±1.59 | 0.065 ±0.03                  | 0.003 ±0    | 0.046 ±0.03 | 0.131 ±0.04 |

  

| <b>(e) R-weighted mean total biomass (g)</b> |             |             |            |             | <b>R-weighted mean ratio</b> |             |             |             |
|----------------------------------------------|-------------|-------------|------------|-------------|------------------------------|-------------|-------------|-------------|
| Treatment                                    | Diploid     | Diploid     | Polyploid  | Polyploid   | Diploid                      | Diploid     | Polyploid   | Polyploid   |
|                                              | 1C< 5pg     | 1C≥ 5pg     | 1C< 5pg    | 1C≥ 5pg     | 1C< 5pg                      | 1C≥ 5pg     | 1C< 5pg     | 1C≥ 5pg     |
| Control                                      | 2.822 ±1.63 | 0.252 ±0.22 | 3.68 ±0.86 | 3.268 ±0.68 | 0.086 ±0.04                  | 0.007 ±0.01 | 0.118 ±0.03 | 0.106 ±0.03 |

|     |             |             |             |             |             |             |             |             |
|-----|-------------|-------------|-------------|-------------|-------------|-------------|-------------|-------------|
| N   | 3.502 ±1.6  | 0.151 ±0.18 | 4.518 ±1.83 | 2.812 ±1.31 | 0.102 ±0.05 | 0.005 ±0.01 | 0.129 ±0.04 | 0.083 ±0.04 |
| P   | 5.979 ±3.16 | 0.099 ±0.1  | 3.638 ±2.27 | 4.316 ±1.3  | 0.13 ±0.04  | 0.003 ±0    | 0.087 ±0.05 | 0.098 ±0.02 |
| N+P | 5.208 ±2.67 | 0.034 ±0.06 | 2.412 ±1.41 | 7.464 ±1.65 | 0.087 ±0.04 | 0.001 ±0    | 0.046 ±0.03 | 0.133 ±0.04 |

---



**Table S5** Treatment contrasts and ANOVA output testing the effects and interactions of N, P, GS (small vs large, where large GS  $\geq 5$  pg), ploidy (diploid vs polyploid), on square-root transformed subplot dependent variables: (a) total biomass; (b) total species numbers; (d) C-weighted biomass; (e) S-weighted biomass; and (f) R-weighted biomass testing for significance in treatment, GS, and ploidy. Part (c) shows multivariate ANOVA output where each C-S-R-weighted biomass are the response variables (i.e.  $n = 3$ ). Baseline levels in the contrasts are: without N, without P, diploid, and small GS for N, P, GS and ploidy effects respectively (e.g. there is a 0.2 g increase in biomass with the addition of N, relative to subplots without N).

| <b>(a) Biomass</b>  |          |            |         |          |                     |        |          |         |
|---------------------|----------|------------|---------|----------|---------------------|--------|----------|---------|
|                     | Estimate | Std. error | t-value | Pr(> t ) | ANOVA               | df     | F-value  | P-value |
| (Intercept)         | 2.833    | 0.209      | 13.564  | <0.0001  | (Intercept)         | 1, 180 | 4171.593 | <0.0001 |
| N                   | 0.202    | 0.302      | 0.667   | 0.5072   | N                   | 1, 60  | 6.101    | 0.0164  |
| P                   | 1.212    | 0.276      | 4.385   | <0.0001  | P                   | 1, 60  | 24.497   | <0.0001 |
| GS                  | -1.884   | 0.295      | -6.378  | <0.0001  | GS                  | 1, 180 | 111.167  | <0.0001 |
| ploidy              | 0.624    | 0.295      | 2.111   | 0.0361   | ploidy              | 1, 180 | 361.882  | <0.0001 |
| N : P               | -0.506   | 0.381      | -1.33   | 0.1885   | N : P               | 1, 60  | 1.084    | 0.3019  |
| N : GS              | -0.368   | 0.427      | -0.861  | 0.3904   | N : GS              | 1, 180 | 11.836   | 0.0007  |
| P : GS              | -1.497   | 0.391      | -3.83   | 0.0002   | P : GS              | 1, 180 | 7.649    | 0.0063  |
| N : ploidy          | 0.138    | 0.427      | 0.323   | 0.7468   | N : ploidy          | 1, 180 | 18.713   | <0.0001 |
| P : ploidy          | -1.364   | 0.391      | -3.491  | 0.0006   | P : ploidy          | 1, 180 | 4.092    | 0.0446  |
| GS : ploidy         | 1.529    | 0.418      | 3.659   | 0.0003   | GS : ploidy         | 1, 180 | 476.754  | <0.0001 |
| N : P : GS          | 0.311    | 0.538      | 0.577   | 0.5648   | N : P : GS          | 1, 180 | 18.067   | <0.0001 |
| N : P : ploidy      | -0.209   | 0.538      | -0.388  | 0.6983   | N : P : ploidy      | 1, 180 | 8.328    | 0.0044  |
| N : GS : ploidy     | -0.177   | 0.604      | -0.292  | 0.7703   | N : GS : ploidy     | 1, 180 | 27.93    | <0.0001 |
| P : GS : ploidy     | 2.34     | 0.553      | 4.234   | <0.0001  | P : GS : ploidy     | 1, 180 | 95.669   | <0.0001 |
| N : P : GS : ploidy | 2.615    | 0.761      | 3.435   | 0.0007   | N : P : GS : ploidy | 1, 180 | 11.798   | 0.0007  |

  

| <b>(b) Species number</b> |          |            |         |          |                 |        |          |         |
|---------------------------|----------|------------|---------|----------|-----------------|--------|----------|---------|
|                           | Estimate | Std. error | t-value | Pr(> t ) | ANOVA           | df     | F-value  | P-value |
| (Intercept)               | 4.356    | 0.098      | 44.548  | <0.0001  | (Intercept)     | 1, 180 | 6513.509 | <0.0001 |
| N                         | -0.478   | 0.141      | -3.379  | 0.0013   | N               | 1, 60  | 77.91    | <0.0001 |
| P                         | -0.458   | 0.129      | -3.545  | 0.0008   | P               | 1, 60  | 44.253   | <0.0001 |
| GS                        | -2.941   | 0.138      | -21.272 | <0.0001  | GS              | 1, 180 | 1719.748 | <0.0001 |
| ploidy                    | -1.01    | 0.138      | -7.301  | <0.0001  | ploidy          | 1, 180 | 28.194   | <0.0001 |
| N : P                     | -0.326   | 0.178      | -1.829  | 0.0723   | N : P           | 1, 60  | 5.2      | 0.0262  |
| N : GS                    | 0.365    | 0.2        | 1.824   | 0.0242   | N : GS          | 1, 180 | 46.525   | <0.0001 |
| P : GS                    | 0.2      | 0.183      | 1.091   | 0.1758   | P : GS          | 1, 180 | 33.378   | <0.0001 |
| N : ploidy                | 0.007    | 0.2        | 0.035   | 0.9649   | N : ploidy      | 1, 180 | 0.258    | 0.6118  |
| P : ploidy                | 0.027    | 0.183      | 0.149   | 0.853    | P : ploidy      | 1, 180 | 7.81     | 0.0058  |
| GS : ploidy               | 2.142    | 0.196      | 10.951  | <0.0001  | GS : ploidy     | 1, 180 | 1227.501 | <0.0001 |
| N : P : GS                | 0.02     | 0.252      | 0.08    | 0.9207   | N : P : GS      | 1, 180 | 0.763    | 0.3836  |
| N : P : ploidy            | -0.057   | 0.252      | -0.226  | 0.7783   | N : P : ploidy  | 1, 180 | 0.111    | 0.739   |
| N : GS : ploidy           | -0.054   | 0.283      | -0.19   | 0.8133   | N : GS : ploidy | 1, 180 | 0.873    | 0.3515  |

|                     |       |       |       |        |                     |        |       |        |
|---------------------|-------|-------|-------|--------|---------------------|--------|-------|--------|
| P : GS : ploidy     | 0.294 | 0.259 | 1.138 | 0.1581 | P : GS : ploidy     | 1, 180 | 8.032 | 0.0051 |
| N : P : GS : ploidy | 0.21  | 0.356 | 0.588 | 0.4649 | N : P : GS : ploidy | 1, 180 | 0.536 | 0.4649 |

**(c) C-S-R**

|                     | Estimate | Std.<br>error | t-value | Pr(> t ) | ANOVA               | df     | F-value  | P-value |
|---------------------|----------|---------------|---------|----------|---------------------|--------|----------|---------|
| (Intercept)         | 4.897    | 0.351         | 13.941  | <0.0001  | (Intercept)         | 1, 180 | 4311.457 | <0.0001 |
| N                   | 0.35     | 0.508         | 0.69    | 0.493    | N                   | 1, 60  | 4.514    | 0.0377  |
| P                   | 2.103    | 0.465         | 4.525   | <0.0001  | P                   | 1, 60  | 22.648   | <0.0001 |
| GS                  | -3.34    | 0.497         | -6.724  | <0.0001  | GS                  | 1, 180 | 127.655  | <0.0001 |
| ploidy              | 1.083    | 0.497         | 2.18    | 0.0305   | ploidy              | 1, 180 | 371.2    | <0.0001 |
| N : P               | -0.923   | 0.64          | -1.442  | 0.1544   | N : P               | 1, 60  | 0.613    | 0.4367  |
| N : GS              | -0.624   | 0.718         | -0.868  | 0.3863   | N : GS              | 1, 180 | 11.467   | 0.0009  |
| P : GS              | -2.574   | 0.657         | -3.917  | 0.0001   | P : GS              | 1, 180 | 7.245    | 0.0078  |
| N : ploidy          | 0.23     | 0.718         | 0.32    | 0.7493   | N : ploidy          | 1, 180 | 16.275   | 0.0001  |
| P : ploidy          | -2.374   | 0.657         | -3.613  | 0.0004   | P : ploidy          | 1, 180 | 2.899    | 0.0903  |
| GS : ploidy         | 2.732    | 0.703         | 3.888   | 0.0001   | GS : ploidy         | 1, 180 | 495.404  | <0.0001 |
| N : P : GS          | 0.604    | 0.905         | 0.667   | 0.5057   | N : P : GS          | 1, 180 | 18.09    | <0.0001 |
| N : P : ploidy      | -0.375   | 0.905         | -0.414  | 0.6793   | N : P : ploidy      | 1, 180 | 7.423    | 0.0071  |
| N : GS : ploidy     | -0.316   | 1.016         | -0.311  | 0.7562   | N : GS : ploidy     | 1, 180 | 25.867   | <0.0001 |
| P : GS : ploidy     | 3.999    | 0.929         | 4.303   | <0.0001  | P : GS : ploidy     | 1, 180 | 95.052   | <0.0001 |
| N : P : GS : ploidy | 4.238    | 1.28          | 3.31    | 0.0011   | N : P : GS : ploidy | 1, 180 | 10.957   | 0.0011  |

**(d) C**

|                     | Estimate | Std.<br>error | t-value | Pr(> t ) | ANOVA               | df     | F-value | P-value |
|---------------------|----------|---------------|---------|----------|---------------------|--------|---------|---------|
| (Intercept)         | 1.543    | 0.158         | 9.785   | <0.0001  | (Intercept)         | 1, 180 | 2306.12 | <0.0001 |
| N                   | 0.214    | 0.228         | 0.94    | 0.3508   | N                   | 1, 60  | 24.796  | <0.0001 |
| P                   | 0.789    | 0.209         | 3.781   | 0.0004   | P                   | 1, 60  | 38.771  | <0.0001 |
| GS                  | -1.197   | 0.223         | -5.37   | <0.0001  | GS                  | 1, 180 | 58.754  | <0.0001 |
| ploidy              | 0.464    | 0.223         | 2.082   | 0.0313   | ploidy              | 1, 180 | 411.583 | <0.0001 |
| N : P               | -0.204   | 0.287         | -0.711  | 0.4801   | N : P               | 1, 60  | 3.489   | 0.0667  |
| N : GS              | -0.231   | 0.322         | -0.716  | 0.4561   | N : GS              | 1, 180 | 14.344  | 0.0002  |
| P : GS              | -0.867   | 0.295         | -2.937  | 0.0025   | P : GS              | 1, 180 | 13.775  | 0.0003  |
| N : ploidy          | 0.152    | 0.322         | 0.47    | 0.6247   | N : ploidy          | 1, 180 | 28.87   | <0.0001 |
| P : ploidy          | -0.778   | 0.295         | -2.636  | 0.0066   | P : ploidy          | 1, 180 | 11.163  | 0.001   |
| GS : ploidy         | 0.965    | 0.315         | 3.061   | 0.0017   | GS : ploidy         | 1, 180 | 425.739 | <0.0001 |
| N : P : GS          | 0.076    | 0.406         | 0.187   | 0.8453   | N : P : GS          | 1, 180 | 18.824  | <0.0001 |
| N : P : ploidy      | -0.189   | 0.406         | -0.465  | 0.6282   | N : P : ploidy      | 1, 180 | 11.399  | 0.0009  |
| N : GS : ploidy     | -0.169   | 0.456         | -0.371  | 0.699    | N : GS : ploidy     | 1, 180 | 35.335  | <0.0001 |
| P : GS : ploidy     | 1.494    | 0.417         | 3.582   | 0.0003   | P : GS : ploidy     | 1, 180 | 94.449  | <0.0001 |
| N : P : GS : ploidy | 2.239    | 0.575         | 3.895   | 0.0001   | N : P : GS : ploidy | 1, 180 | 16.502  | 0.0001  |

**(e) S**

|  | Estimate | Std.<br>error | t-value | Pr(> t ) | ANOVA | df | F-value | P-value |
|--|----------|---------------|---------|----------|-------|----|---------|---------|
|--|----------|---------------|---------|----------|-------|----|---------|---------|

|                     |        |       |        |         |                     |        |          |         |
|---------------------|--------|-------|--------|---------|---------------------|--------|----------|---------|
| (Intercept)         | 1.753  | 0.113 | 15.552 | <0.0001 | (Intercept)         | 1, 180 | 4286.365 | <0.0001 |
| N                   | -0.07  | 0.163 | -0.428 | 0.67    | N                   | 1, 60  | 3.18     | 0.0796  |
| P                   | 0.537  | 0.149 | 3.602  | 0.0006  | P                   | 1, 60  | 2.458    | 0.1222  |
| GS                  | -0.998 | 0.159 | -6.259 | <0.0001 | GS                  | 1, 180 | 118.499  | <0.0001 |
| ploidy              | 0.314  | 0.159 | 1.967  | 0.0507  | ploidy              | 1, 180 | 261.774  | <0.0001 |
| N : P               | -0.34  | 0.205 | -1.656 | 0.1029  | N : P               | 1, 60  | 0.065    | 0.7998  |
| N : GS              | -0.054 | 0.231 | -0.235 | 0.8146  | N : GS              | 1, 180 | 11.517   | 0.0008  |
| P : GS              | -0.754 | 0.211 | -3.577 | 0.0004  | P : GS              | 1, 180 | 4.303    | 0.0395  |
| N : ploidy          | 0.104  | 0.231 | 0.451  | 0.6526  | N : ploidy          | 1, 180 | 11.367   | 0.0009  |
| P : ploidy          | -0.735 | 0.211 | -3.486 | 0.0006  | P : ploidy          | 1, 180 | 1.121    | 0.2912  |
| GS : ploidy         | 0.73   | 0.225 | 3.236  | 0.0014  | GS : ploidy         | 1, 180 | 349.74   | <0.0001 |
| N : P : GS          | 0.172  | 0.291 | 0.593  | 0.5539  | N : P : GS          | 1, 180 | 11.28    | 0.001   |
| N : P : ploidy      | -0.062 | 0.291 | -0.213 | 0.8315  | N : P : ploidy      | 1, 180 | 4.922    | 0.0278  |
| N : GS : ploidy     | -0.145 | 0.326 | -0.445 | 0.657   | N : GS : ploidy     | 1, 180 | 13.477   | 0.0003  |
| P : GS : ploidy     | 1.207  | 0.298 | 4.047  | 0.0001  | P : GS : ploidy     | 1, 180 | 73.004   | <0.0001 |
| N : P : GS : ploidy | 1.035  | 0.411 | 2.52   | 0.0126  | N : P : GS : ploidy | 1, 180 | 6.349    | 0.0126  |

(f) R

|                     | Estimate | Std.<br>error | t-value | Pr(> t ) | ANOVA               | df     | F-value  | P-value |
|---------------------|----------|---------------|---------|----------|---------------------|--------|----------|---------|
| (Intercept)         | 1.601    | 0.115         | 13.887  | <0.0001  | (Intercept)         | 1, 180 | 3952.054 | <0.0001 |
| N                   | 0.206    | 0.167         | 1.234   | 0.222    | N                   | 1, 60  | 0.395    | 0.5321  |
| P                   | 0.777    | 0.153         | 5.094   | <0.0001  | P                   | 1, 60  | 12.097   | 0.0009  |
| GS                  | -1.145   | 0.163         | -7.022  | <0.0001  | GS                  | 1, 180 | 188.478  | <0.0001 |
| ploidy              | 0.305    | 0.163         | 1.873   | 0.0627   | ploidy              | 1, 180 | 264.955  | <0.0001 |
| N : P               | -0.379   | 0.21          | -1.804  | 0.0763   | N : P               | 1, 60  | 0.045    | 0.8329  |
| N : GS              | -0.339   | 0.236         | -1.437  | 0.1525   | N : GS              | 1, 180 | 4.131    | 0.0436  |
| P : GS              | -0.953   | 0.216         | -4.418  | <0.0001  | P : GS              | 1, 180 | 1.706    | 0.1932  |
| N : ploidy          | -0.026   | 0.236         | -0.108  | 0.9138   | N : ploidy          | 1, 180 | 3.799    | 0.0529  |
| P : ploidy          | -0.861   | 0.216         | -3.994  | 0.0001   | P : ploidy          | 1, 180 | 0.052    | 0.8194  |
| GS : ploidy         | 1.037    | 0.231         | 4.496   | <0.0001  | GS : ploidy         | 1, 180 | 504.959  | <0.0001 |
| N : P : GS          | 0.355    | 0.297         | 1.196   | 0.2333   | N : P : GS          | 1, 180 | 15.884   | 0.0001  |
| N : P : ploidy      | -0.124   | 0.297         | -0.417  | 0.677    | N : P : ploidy      | 1, 180 | 2.904    | 0.0901  |
| N : GS : ploidy     | -0.002   | 0.333         | -0.005  | 0.9962   | N : GS : ploidy     | 1, 180 | 16.904   | 0.0001  |
| P : GS : ploidy     | 1.298    | 0.305         | 4.254   | <0.0001  | P : GS : ploidy     | 1, 180 | 74.063   | <0.0001 |
| N : P : GS : ploidy | 0.964    | 0.42          | 2.294   | 0.0229   | N : P : GS : ploidy | 1, 180 | 5.264    | 0.0229  |

**Table S6** ANOVA output testing the effect of N and P treatment on *pgls* mean GS of each subplot : a) phylogenetic least squares biomass-weighted mean GS (= ‘biomass-weighted mean  $1C_{pgls}$ -value’) which takes into account each taxon’s contribution to total biomass; and (b) phylogeny-adjusted ‘presence-absence mean  $1C_{pgls}$ -value’, where biomass was not taken into account. The intercepts below show the estimated *pgls* mean subplot GS without N or P treatment (control plots), and the estimated coefficients in the second column show the effects of N application (i.e. without P), the effects of P application (i.e. without N), and the effects when both are applied on a subplot. The reference level is no application of N or P. Significant parameters are in bold ( $P$ -value < 0.05).

| <b>(a) Biomass-weighted mean <math>1C_{pgls}</math></b> |              |              |              |                |              |              |                |                   |
|---------------------------------------------------------|--------------|--------------|--------------|----------------|--------------|--------------|----------------|-------------------|
|                                                         | Estimate     | Std. error   | t-value      | Pr(> t )       | ANOVA:       | df           | F-value        | $P$ -value        |
| intercept                                               | 3.192        | 0.296        | 10.785       | <0.00001       | intercept    | 1, 60        | 885.1916       | <0.0001           |
| N                                                       | 0.052        | 0.428        | 0.121        | 0.90373        | <b>N</b>     | <b>1, 60</b> | <b>36.0665</b> | <b>&lt;0.0001</b> |
| P                                                       | -0.504       | 0.397        | -1.269       | 0.20940        | <b>P</b>     | <b>1, 60</b> | <b>6.7855</b>  | <b>0.0116</b>     |
| <b>N : P</b>                                            | <b>2.250</b> | <b>0.542</b> | <b>4.151</b> | <b>0.00011</b> | <b>N : P</b> | <b>1, 60</b> | <b>17.2289</b> | <b>0.0001</b>     |

  

| <b>(b) Presence-absence mean <math>1C_{pgls}</math></b> |              |              |              |                |              |              |                |                   |
|---------------------------------------------------------|--------------|--------------|--------------|----------------|--------------|--------------|----------------|-------------------|
|                                                         | Estimate     | Std. error   | t-value      | Pr(> t )       | ANOVA:       | df           | F-value        | $P$ -value        |
| intercept                                               | 2.136        | 0.114        | 18.743       | <0.00001       | intercept    | 1, 60        | 2436.64        | <0.0001           |
| N                                                       | 0.001        | 0.165        | 0.003        | 0.99750        | <b>N</b>     | <b>1, 60</b> | <b>20.5973</b> | <b>&lt;0.0001</b> |
| P                                                       | 0.068        | 0.153        | 0.444        | 0.65850        | <b>P</b>     | <b>1, 60</b> | <b>15.2558</b> | <b>0.0002</b>     |
| <b>N : P</b>                                            | <b>0.630</b> | <b>0.209</b> | <b>3.021</b> | <b>0.00370</b> | <b>N : P</b> | <b>1, 60</b> | <b>9.1268</b>  | <b>0.0037</b>     |

**Table S7** Different 1C-value thresholds for small vs large GS were investigated. This table shows means, ratios, and standard deviations where large GS  $\geq 2.5$  pg between the four genomic groups for: (a) total subplot biomass; (b) total number of species per subplot, and (c) total C-weighted; (d) total S-weighted; (e) total R-weighted biomass. As above, the four genomic groups of taxa are: diploid taxa with small GS; diploid taxa with big GS; polyploid taxa with small GS; and polyploid taxa with big GS. 1C= 1C-value (pg). The number of subplots per treatment is as follows: control = 12, N = 11, P = 16, N + P = 25. See also Figs S7 and S10.

| <b>(a)</b> |                  | <b>Mean total biomass (g)</b> |                  |                   |                  | <b>Mean ratio total biomass</b> |                  |                  |  |
|------------|------------------|-------------------------------|------------------|-------------------|------------------|---------------------------------|------------------|------------------|--|
| Treatment  | Diploid          | Diploid                       | Polyploid        | Polyploid         | Diploid          | Diploid                         | Polyploid        | Polyploid        |  |
|            | 1C < 2.5pg       | 1C $\geq$ 2.5pg               | 1C < 2.5pg       | 1C $\geq$ 2.5pg   | 1C < 2.5pg       | 1C $\geq$ 2.5pg                 | 1C < 2.5pg       | 1C $\geq$ 2.5pg  |  |
| Control    | 3.293 $\pm$ 2.09 | 6.63 $\pm$ 3.77               | 3.959 $\pm$ 1.96 | 17.825 $\pm$ 3.44 | 0.099 $\pm$ 0.06 | 0.201 $\pm$ 0.1                 | 0.122 $\pm$ 0.05 | 0.578 $\pm$ 0.16 |  |
| N          | 4.1 $\pm$ 1.66   | 6.697 $\pm$ 3.61              | 4.052 $\pm$ 3.15 | 19.62 $\pm$ 6.16  | 0.12 $\pm$ 0.05  | 0.198 $\pm$ 0.12                | 0.115 $\pm$ 0.08 | 0.567 $\pm$ 0.16 |  |
| P          | 12.206 $\pm$ 8.7 | 5.579 $\pm$ 3.16              | 2.706 $\pm$ 2.17 | 23.995 $\pm$ 6.54 | 0.251 $\pm$ 0.11 | 0.14 $\pm$ 0.09                 | 0.064 $\pm$ 0.05 | 0.545 $\pm$ 0.1  |  |
| N+P        | 12.218 $\pm$ 6.8 | 2.83 $\pm$ 1.6                | 0.068 $\pm$ 0.18 | 43.246 $\pm$ 9.63 | 0.202 $\pm$ 0.11 | 0.051 $\pm$ 0.03                | 0.001 $\pm$ 0    | 0.746 $\pm$ 0.11 |  |

  

| <b>(b)</b> |            | <b>Mean total number of species</b> |            |                 |                  | <b>Mean ratio species number</b> |                  |                  |  |
|------------|------------|-------------------------------------|------------|-----------------|------------------|----------------------------------|------------------|------------------|--|
| Treatment  | Diploid    | Diploid                             | Polyploid  | Polyploid       | Diploid          | Diploid                          | Polyploid        | Polyploid        |  |
|            | 1C < 2.5pg | 1C $\geq$ 2.5pg                     | 1C < 2.5pg | 1C $\geq$ 2.5pg | 1C < 2.5pg       | 1C $\geq$ 2.5pg                  | 1C < 2.5pg       | 1C $\geq$ 2.5pg  |  |
| Control    | 12 $\pm$ 2 | 9 $\pm$ 1                           | 39 $\pm$ 4 | 6 $\pm$ 1       | 0.307 $\pm$ 0.03 | 0.234 $\pm$ 0.02                 | 0.167 $\pm$ 0.02 | 0.291 $\pm$ 0.03 |  |
| N          | 9 $\pm$ 2  | 8 $\pm$ 2                           | 31 $\pm$ 5 | 3 $\pm$ 1       | 0.291 $\pm$ 0.04 | 0.251 $\pm$ 0.02                 | 0.107 $\pm$ 0.03 | 0.352 $\pm$ 0.07 |  |
| P          | 10 $\pm$ 1 | 7 $\pm$ 2                           | 32 $\pm$ 4 | 4 $\pm$ 2       | 0.304 $\pm$ 0.04 | 0.215 $\pm$ 0.03                 | 0.113 $\pm$ 0.04 | 0.368 $\pm$ 0.03 |  |
| N+P        | 7 $\pm$ 2  | 4 $\pm$ 2                           | 20 $\pm$ 5 | 0 $\pm$ 1       | 0.333 $\pm$ 0.06 | 0.184 $\pm$ 0.06                 | 0.018 $\pm$ 0.04 | 0.465 $\pm$ 0.06 |  |

  

| <b>(c)</b> |                  | <b>C-weighted mean total biomass (g)</b> |                  |                   |                  | <b>C-weighted mean biomass ratio</b> |                  |                  |  |
|------------|------------------|------------------------------------------|------------------|-------------------|------------------|--------------------------------------|------------------|------------------|--|
| Treatment  | Diploid          | Diploid                                  | Polyploid        | Polyploid         | Diploid          | Diploid                              | Polyploid        | Polyploid        |  |
|            | 1C < 2.5pg       | 1C $\geq$ 2.5pg                          | 1C < 2.5pg       | 1C $\geq$ 2.5pg   | 1C < 2.5pg       | 1C $\geq$ 2.5pg                      | 1C < 2.5pg       | 1C $\geq$ 2.5pg  |  |
| Control    | 0.957 $\pm$ 0.67 | 1.843 $\pm$ 1.07                         | 1.097 $\pm$ 0.53 | 6.157 $\pm$ 1.05  | 0.029 $\pm$ 0.02 | 0.056 $\pm$ 0.03                     | 0.034 $\pm$ 0.02 | 0.199 $\pm$ 0.05 |  |
| N          | 1.331 $\pm$ 0.57 | 2.157 $\pm$ 1.1                          | 1.328 $\pm$ 1.06 | 7.646 $\pm$ 2.44  | 0.039 $\pm$ 0.02 | 0.063 $\pm$ 0.04                     | 0.038 $\pm$ 0.03 | 0.219 $\pm$ 0.05 |  |
| P          | 4.135 $\pm$ 3.36 | 1.776 $\pm$ 0.95                         | 0.846 $\pm$ 0.71 | 9.809 $\pm$ 3.88  | 0.083 $\pm$ 0.05 | 0.044 $\pm$ 0.03                     | 0.02 $\pm$ 0.01  | 0.215 $\pm$ 0.04 |  |
| N+P        | 5.018 $\pm$ 2.95 | 0.934 $\pm$ 0.53                         | 0.025 $\pm$ 0.07 | 23.657 $\pm$ 9.63 | 0.081 $\pm$ 0.04 | 0.017 $\pm$ 0.01                     | 0.001 $\pm$ 0    | 0.391 $\pm$ 0.1  |  |

  

| <b>(d)</b> |                  | <b>S-weighted mean total biomass (g)</b> |                  |                  |                  | <b>S-weighted mean biomass ratio</b> |                  |                  |  |
|------------|------------------|------------------------------------------|------------------|------------------|------------------|--------------------------------------|------------------|------------------|--|
| Treatment  | Diploid          | Diploid                                  | Polyploid        | Polyploid        | Diploid          | Diploid                              | Polyploid        | Polyploid        |  |
|            | 1C < 2.5pg       | 1C $\geq$ 2.5pg                          | 1C < 2.5pg       | 1C $\geq$ 2.5pg  | 1C < 2.5pg       | 1C $\geq$ 2.5pg                      | 1C < 2.5pg       | 1C $\geq$ 2.5pg  |  |
| Control    | 1.224 $\pm$ 0.69 | 2.825 $\pm$ 1.62                         | 1.764 $\pm$ 1    | 5.816 $\pm$ 1.21 | 0.037 $\pm$ 0.02 | 0.085 $\pm$ 0.04                     | 0.054 $\pm$ 0.03 | 0.189 $\pm$ 0.06 |  |
| N          | 1.287 $\pm$ 0.53 | 2.37 $\pm$ 1.54                          | 1.407 $\pm$ 1.07 | 5.96 $\pm$ 1.93  | 0.038 $\pm$ 0.02 | 0.071 $\pm$ 0.05                     | 0.04 $\pm$ 0.03  | 0.173 $\pm$ 0.05 |  |
| P          | 3.785 $\pm$ 2.2  | 2.009 $\pm$ 1.26                         | 1.025 $\pm$ 0.76 | 7.066 $\pm$ 1.8  | 0.08 $\pm$ 0.03  | 0.051 $\pm$ 0.04                     | 0.025 $\pm$ 0.02 | 0.164 $\pm$ 0.04 |  |
| N + P      | 2.893 $\pm$ 1.79 | 0.961 $\pm$ 0.55                         | 0.025 $\pm$ 0.07 | 9.733 $\pm$ 1.83 | 0.05 $\pm$ 0.03  | 0.017 $\pm$ 0.01                     | 0.001 $\pm$ 0    | 0.176 $\pm$ 0.06 |  |

  

| <b>(e)</b> |                  | <b>R-weighted mean total biomass (g)</b> |                  |                  |                  | <b>R-weighted mean biomass ratio</b> |                  |                  |  |
|------------|------------------|------------------------------------------|------------------|------------------|------------------|--------------------------------------|------------------|------------------|--|
| Treatment  | Diploid          | Diploid                                  | Polyploid        | Polyploid        | Diploid          | Diploid                              | Polyploid        | Polyploid        |  |
|            | 1C < 2.5pg       | 1C $\geq$ 2.5pg                          | 1C < 2.5pg       | 1C $\geq$ 2.5pg  | 1C < 2.5pg       | 1C $\geq$ 2.5pg                      | 1C < 2.5pg       | 1C $\geq$ 2.5pg  |  |
| Control    | 1.224 $\pm$ 0.69 | 2.825 $\pm$ 1.62                         | 1.764 $\pm$ 1    | 5.816 $\pm$ 1.21 | 0.037 $\pm$ 0.02 | 0.085 $\pm$ 0.04                     | 0.054 $\pm$ 0.03 | 0.189 $\pm$ 0.06 |  |
| N          | 1.287 $\pm$ 0.53 | 2.37 $\pm$ 1.54                          | 1.407 $\pm$ 1.07 | 5.96 $\pm$ 1.93  | 0.038 $\pm$ 0.02 | 0.071 $\pm$ 0.05                     | 0.04 $\pm$ 0.03  | 0.173 $\pm$ 0.05 |  |
| P          | 3.785 $\pm$ 2.2  | 2.009 $\pm$ 1.26                         | 1.025 $\pm$ 0.76 | 7.066 $\pm$ 1.8  | 0.08 $\pm$ 0.03  | 0.051 $\pm$ 0.04                     | 0.025 $\pm$ 0.02 | 0.164 $\pm$ 0.04 |  |
| N + P      | 2.893 $\pm$ 1.79 | 0.961 $\pm$ 0.55                         | 0.025 $\pm$ 0.07 | 9.733 $\pm$ 1.83 | 0.05 $\pm$ 0.03  | 0.017 $\pm$ 0.01                     | 0.001 $\pm$ 0    | 0.176 $\pm$ 0.06 |  |

| Treatment | Diploid     |             | Polyploid   |             | Diploid     |             | Polyploid   |             |
|-----------|-------------|-------------|-------------|-------------|-------------|-------------|-------------|-------------|
|           | 1C < 2.5pg  | 1C ≥ 2.5pg  | 1C < 2.5pg  | 1C ≥ 2.5pg  | 1C < 2.5pg  | 1C ≥ 2.5pg  | 1C < 2.5pg  | 1C ≥ 2.5pg  |
| Control   | 1.112 ±0.73 | 1.962 ±1.1  | 1.098 ±0.54 | 5.85 ±1.19  | 0.033 ±0.02 | 0.06 ±0.03  | 0.034 ±0.02 | 0.19 ±0.06  |
| N         | 1.482 ±0.62 | 2.171 ±1.1  | 1.317 ±1.03 | 6.013 ±1.97 | 0.043 ±0.02 | 0.064 ±0.04 | 0.037 ±0.03 | 0.174 ±0.05 |
| P         | 4.286 ±3.17 | 1.793 ±0.97 | 0.835 ±0.72 | 7.119 ±1.78 | 0.088 ±0.04 | 0.045 ±0.03 | 0.02 ±0.01  | 0.166 ±0.04 |
| N+P       | 4.307 ±2.6  | 0.935 ±0.53 | 0.018 ±0.04 | 9.857 ±1.85 | 0.071 ±0.04 | 0.017 ±0.01 | 0 ±0        | 0.178 ±0.06 |

**Table S8** Large GS  $\geq 2.5$  pg. Treatment contrasts and ANOVA output testing the effects and interactions of N, P, GS (small vs large, where large GS  $\geq 2.5$  pg), and ploidy (diploid vs polyploid), on subplot: (a) total biomass; (b) total species numbers; (d) C-weighted biomass; (e) S-weighted biomass; and (f) R-weighted biomass testing for significance in treatment, GS, and ploidy. Part (c) shows multivariate ANOVA output where each C-S-R-weighted biomass are the response variables (i.e.  $n = 3$ ). Baseline levels in the contrasts are: without N, without P, diploid, and small GS for N, P, GS and ploidy effects respectively. Dependent variables (i.e. total biomass, species numbers, C, S, R-weighted biomass) were square-root transformed.

| <b>(a) Biomass</b>  |          |            |         |          |                     |        |          |         |
|---------------------|----------|------------|---------|----------|---------------------|--------|----------|---------|
|                     | Estimate | Std. error | t-value | Pr(> t ) | ANOVA               | df     | F-value  | P-value |
| (Intercept)         | 1.727    | 0.209      | 8.283   | <0.0001  | (Intercept)         | 1, 180 | 3903.145 | <0.0001 |
| N                   | 0.237    | 0.302      | 0.787   | 0.4345   | N                   | 1, 60  | 0.039    | 0.8436  |
| P                   | 1.588    | 0.276      | 5.757   | <0.0001  | P                   | 1, 60  | 10.182   | 0.0023  |
| GS                  | 0.724    | 0.295      | 2.456   | 0.015    | GS                  | 1, 180 | 371.789  | <0.0001 |
| ploidy              | 0.202    | 0.295      | 0.685   | 0.4941   | ploidy              | 1, 180 | 74.589   | <0.0001 |
| N : P               | -0.232   | 0.380      | -0.612  | 0.543    | N : P               | 1, 60  | 1.089    | 0.3009  |
| N : GS              | -0.210   | 0.426      | -0.492  | 0.6232   | N : GS              | 1, 180 | 18.915   | <0.0001 |
| P : GS              | -1.780   | 0.390      | -4.562  | <0.0001  | P : GS              | 1, 180 | 2.214    | 0.1385  |
| N : ploidy          | -0.258   | 0.426      | -0.605  | 0.5459   | N : ploidy          | 1, 180 | 1.756    | 0.1868  |
| P : ploidy          | -2.006   | 0.390      | -5.143  | <0.0001  | P : ploidy          | 1, 180 | 2.570    | 0.1106  |
| GS : ploidy         | 1.549    | 0.417      | 3.715   | 0.0003   | GS : ploidy         | 1, 180 | 738.763  | <0.0001 |
| N : P : GS          | -0.459   | 0.537      | -0.854  | 0.3944   | N : P : GS          | 1, 180 | 10.145   | 0.0017  |
| N : P : ploidy      | -1.142   | 0.537      | -2.125  | 0.0349   | N : P : ploidy      | 1, 180 | 1.924    | 0.1671  |
| N : GS : ploidy     | 0.409    | 0.603      | 0.679   | 0.4981   | N : GS : ploidy     | 1, 180 | 71.494   | <0.0001 |
| P : GS : ploidy     | 2.849    | 0.552      | 5.163   | <0.0001  | P : GS : ploidy     | 1, 180 | 147.459  | <0.0001 |
| N : P : GS : ploidy | 3.339    | 0.760      | 4.392   | <0.0001  | N : P : GS : ploidy | 1, 180 | 19.294   | <0.0001 |

| <b>(b) Species number</b> |          |            |         |          |             |        |          |         |
|---------------------------|----------|------------|---------|----------|-------------|--------|----------|---------|
|                           | Estimate | Std. error | t-value | Pr(> t ) | ANOVA       | df     | F-value  | P-value |
| (Intercept)               | 3.450    | 0.107      | 32.112  | <0.0001  | (Intercept) | 1, 180 | 4776.047 | <0.0001 |
| N                         | -0.449   | 0.155      | -2.889  | 0.0054   | N           | 1, 60  | 93.639   | <0.0001 |
| P                         | -0.343   | 0.142      | -2.413  | 0.0189   | P           | 1, 60  | 52.885   | <0.0001 |
| GS                        | -0.442   | 0.110      | -4.006  | 0.0001   | GS          | 1, 180 | 385.281  | <0.0001 |
| ploidy                    | -0.906   | 0.110      | -8.222  | <0.0001  | ploidy      | 1, 180 | 126.444  | <0.0001 |
| N : P                     | -0.093   | 0.196      | -0.475  | 0.6363   | N : P       | 1, 60  | 7.586    | 0.0078  |
| N : GS                    | 0.221    | 0.159      | 1.390   | 0.1664   | N : GS      | 1, 180 | 55.622   | <0.0001 |

|                     |        |       |        |         |                     |        |          |         |
|---------------------|--------|-------|--------|---------|---------------------|--------|----------|---------|
| P : GS              | -0.047 | 0.146 | -0.322 | 0.7481  | P : GS              | 1, 180 | 27.087   | <0.0001 |
| N : ploidy          | -0.279 | 0.159 | -1.748 | 0.0821  | N : ploidy          | 1, 180 | 12.714   | 0.0005  |
| P : ploidy          | -0.319 | 0.146 | -2.187 | 0.03    | P : ploidy          | 1, 180 | 0.898    | 0.3446  |
| GS : ploidy         | 1.248  | 0.156 | 8.003  | <0.0001 | GS : ploidy         | 1, 180 | 1188.565 | <0.0001 |
| N : P : GS          | -0.394 | 0.201 | -1.963 | 0.0512  | N : P : GS          | 1, 180 | 0.140    | 0.7089  |
| N : P : ploidy      | -0.706 | 0.201 | -3.514 | 0.0006  | N : P : ploidy      | 1, 180 | 3.313    | 0.0704  |
| N : GS : ploidy     | 0.414  | 0.225 | 1.837  | 0.0678  | N : GS : ploidy     | 1, 180 | 69.089   | <0.0001 |
| P : GS : ploidy     | 0.776  | 0.206 | 3.763  | 0.0002  | P : GS : ploidy     | 1, 180 | 77.362   | <0.0001 |
| N : P : GS : ploidy | 0.895  | 0.284 | 3.150  | 0.0019  | N : P : GS : ploidy | 1, 180 | 9.921    | 0.0019  |

**(c) C-S-R**

|                     | Estimate | Std. error | t-value | Pr(> t ) | ANOVA               | df     | F-value  | P-value |
|---------------------|----------|------------|---------|----------|---------------------|--------|----------|---------|
| (Intercept)         | 2.984    | 0.353      | 8.446   | <0.0001  | (Intercept)         | 1, 180 | 4000.850 | <0.0001 |
| N                   | 0.412    | 0.511      | 0.806   | 0.4236   | N                   | 1, 60  | 0.027    | 0.8708  |
| P                   | 2.752    | 0.467      | 5.888   | <0.0001  | P                   | 1, 60  | 8.830    | 0.0043  |
| GS                  | 1.238    | 0.500      | 2.479   | 0.0141   | GS                  | 1, 180 | 374.461  | <0.0001 |
| ploidy              | 0.328    | 0.500      | 0.656   | 0.5127   | ploidy              | 1, 180 | 71.691   | <0.0001 |
| N : P               | -0.464   | 0.644      | -0.721  | 0.4735   | N : P               | 1, 60  | 1.801    | 0.1846  |
| N : GS              | -0.356   | 0.722      | -0.493  | 0.6225   | N : GS              | 1, 180 | 17.357   | <0.0001 |
| P : GS              | -3.064   | 0.661      | -4.636  | <0.0001  | P : GS              | 1, 180 | 1.678    | 0.1969  |
| N : ploidy          | -0.420   | 0.722      | -0.581  | 0.5621   | N : ploidy          | 1, 180 | 1.220    | 0.2708  |
| P : ploidy          | -3.454   | 0.661      | -5.227  | <0.0001  | P : ploidy          | 1, 180 | 3.556    | 0.061   |
| GS : ploidy         | 2.729    | 0.707      | 3.862   | 0.0002   | GS : ploidy         | 1, 180 | 744.348  | <0.0001 |
| N : P : GS          | -0.739   | 0.910      | -0.812  | 0.4181   | N : P : GS          | 1, 180 | 9.677    | 0.0022  |
| N : P : ploidy      | -1.938   | 0.910      | -2.129  | 0.0347   | N : P : ploidy      | 1, 180 | 1.558    | 0.2136  |
| N : GS : ploidy     | 0.658    | 1.022      | 0.644   | 0.5206   | N : GS : ploidy     | 1, 180 | 67.367   | <0.0001 |
| P : GS : ploidy     | 4.850    | 0.935      | 5.189   | <0.0001  | P : GS : ploidy     | 1, 180 | 144.930  | <0.0001 |
| N : P : GS : ploidy | 5.483    | 1.288      | 4.258   | <0.0001  | N : P : GS : ploidy | 1, 180 | 18.135   | <0.0001 |

**(d) C**

|             | Estimate | Std. error | t-value | Pr(> t ) | ANOVA       | df     | F-value  | P-value |
|-------------|----------|------------|---------|----------|-------------|--------|----------|---------|
| (Intercept) | 0.919    | 0.156      | 5.881   | <0.0001  | (Intercept) | 1, 180 | 2216.498 | <0.0001 |
| N           | 0.193    | 0.226      | 0.855   | 0.396    | N           | 1, 60  | 9.008    | 0.0039  |
| P           | 0.981    | 0.207      | 4.745   | <0.0001  | P           | 1, 60  | 21.906   | <0.0001 |
| GS          | 0.367    | 0.213      | 1.719   | 0.0874   | GS          | 1, 180 | 351.150  | <0.0001 |
| ploidy      | 0.097    | 0.213      | 0.453   | 0.6514   | ploidy      | 1, 180 | 107.827  | <0.0001 |
| N : P       | 0.014    | 0.285      | 0.048   | 0.9617   | N : P       | 1, 60  | 0.030    | 0.8641  |



|                     |        |       |        |         |                     |        |         |         |
|---------------------|--------|-------|--------|---------|---------------------|--------|---------|---------|
| N : GS              | -0.069 | 0.308 | -0.225 | 0.8224  | N : GS              | 1, 180 | 25.348  | <0.0001 |
| P : GS              | -0.987 | 0.282 | -3.498 | 0.0006  | P : GS              | 1, 180 | 6.941   | 0.0092  |
| N : ploidy          | -0.120 | 0.308 | -0.389 | 0.6981  | N : ploidy          | 1, 180 | 6.730   | 0.0103  |
| P : ploidy          | -1.153 | 0.282 | -4.087 | 0.0001  | P : ploidy          | 1, 180 | 0.002   | 0.9682  |
| GS : ploidy         | 1.090  | 0.302 | 3.614  | 0.0004  | GS : ploidy         | 1, 180 | 697.041 | <0.0001 |
| N : P : GS          | -0.501 | 0.389 | -1.288 | 0.1993  | N : P : GS          | 1, 180 | 10.430  | 0.0015  |
| N : P : ploidy      | -0.861 | 0.389 | -2.216 | 0.028   | N : P : ploidy      | 1, 180 | 3.678   | 0.0567  |
| N : GS : ploidy     | 0.258  | 0.436 | 0.591  | 0.5556  | N : GS : ploidy     | 1, 180 | 83.273  | <0.0001 |
| P : GS : ploidy     | 1.762  | 0.399 | 4.415  | <0.0001 | P : GS : ploidy     | 1, 180 | 138.086 | <0.0001 |
| N : P : GS : ploidy | 2.777  | 0.550 | 5.052  | <0.0001 | N : P : GS : ploidy | 1, 180 | 25.519  | <0.0001 |

(e) S

|                     | Estimate | Std. error | t-value | Pr(> t ) | ANOVA               | df     | F-value  | P-value |
|---------------------|----------|------------|---------|----------|---------------------|--------|----------|---------|
| (Intercept)         | 1.065    | 0.113      | 9.406   | <0.0001  | (Intercept)         | 1, 180 | 3958.037 | <0.0001 |
| N                   | 0.039    | 0.164      | 0.239   | 0.812    | N                   | 1, 60  | 15.067   | 0.0003  |
| P                   | 0.811    | 0.150      | 5.417   | <0.0001  | P                   | 1, 60  | 0.002    | 0.9659  |
| GS                  | 0.539    | 0.160      | 3.364   | 0.0009   | GS                  | 1, 180 | 338.458  | <0.0001 |
| ploidy              | 0.215    | 0.160      | 1.345   | 0.1802   | ploidy              | 1, 180 | 49.929   | <0.0001 |
| N : P               | -0.301   | 0.206      | -1.460  | 0.1494   | N : P               | 1, 60  | 3.961    | 0.0511  |
| N : GS              | -0.192   | 0.232      | -0.828  | 0.4089   | N : GS              | 1, 180 | 14.325   | 0.0002  |
| P : GS              | -1.069   | 0.212      | -5.048  | <0.0001  | P : GS              | 1, 180 | 0.539    | 0.4637  |
| N : ploidy          | -0.191   | 0.232      | -0.827  | 0.4093   | N : ploidy          | 1, 180 | 0.311    | 0.5778  |
| P : ploidy          | -1.162   | 0.212      | -5.485  | <0.0001  | P : ploidy          | 1, 180 | 5.911    | 0.016   |
| GS : ploidy         | 0.580    | 0.226      | 2.562   | 0.0112   | GS : ploidy         | 1, 180 | 542.580  | <0.0001 |
| N : P : GS          | 0.036    | 0.292      | 0.124   | 0.9015   | N : P : GS          | 1, 180 | 8.425    | 0.0042  |
| N : P : ploidy      | 0.407    | 0.292      | 1.395   | 0.1648   | N : P : ploidy      | 1, 180 | 0.570    | 0.4512  |
| N : GS : ploidy     | 0.359    | 0.327      | 1.095   | 0.2749   | N : GS : ploidy     | 1, 180 | 46.252   | <0.0001 |
| P : GS : ploidy     | 1.659    | 0.300      | 5.537   | <0.0001  | P : GS : ploidy     | 1, 180 | 119.450  | <0.0001 |
| N : P : GS : ploidy | 1.126    | 0.413      | 2.727   | 0.007    | N : P : GS : ploidy | 1, 180 | 7.439    | 0.007   |

(f) R

|             | Estimate | Std. error | t-value | Pr(> t ) | ANOVA       | df     | F-value  | P-value |
|-------------|----------|------------|---------|----------|-------------|--------|----------|---------|
| (Intercept) | 1.000    | 0.119      | 8.422   | <0.0001  | (Intercept) | 1, 180 | 3613.775 | <0.0001 |
| N           | 0.179    | 0.172      | 1.044   | 0.3005   | N           | 1, 60  | 1.269    | 0.2643  |
| P           | 0.959    | 0.157      | 6.110   | <0.0001  | P           | 1, 60  | 4.121    | 0.0468  |
| GS          | 0.333    | 0.168      | 1.985   | 0.0486   | GS          | 1, 180 | 263.553  | <0.0001 |
| ploidy      | 0.016    | 0.168      | 0.094   | 0.9253   | ploidy      | 1, 180 | 27.726   | <0.0001 |

|                     |        |       |        |         |                     |        |         |         |
|---------------------|--------|-------|--------|---------|---------------------|--------|---------|---------|
| N : P               | -0.177 | 0.216 | -0.818 | 0.4169  | N : P               | 1, 60  | 5.499   | 0.0223  |
| N : GS              | -0.095 | 0.243 | -0.393 | 0.6951  | N : GS              | 1, 180 | 5.722   | 0.0178  |
| P : GS              | -1.007 | 0.222 | -4.537 | <0.0001 | P : GS              | 1, 180 | 0.037   | 0.8472  |
| N : ploidy          | -0.108 | 0.243 | -0.446 | 0.6561  | N : ploidy          | 1, 180 | 0.292   | 0.5894  |
| P : ploidy          | -1.139 | 0.222 | -5.131 | <0.0001 | P : ploidy          | 1, 180 | 11.182  | 0.001   |
| GS : ploidy         | 1.058  | 0.237 | 4.457  | <0.0001 | GS : ploidy         | 1, 180 | 646.927 | <0.0001 |
| N : P : GS          | -0.274 | 0.306 | -0.897 | 0.3712  | N : P : GS          | 1, 180 | 5.693   | 0.0181  |
| N : P : ploidy      | -0.670 | 0.306 | -2.189 | 0.0299  | N : P : ploidy      | 1, 180 | 0.311   | 0.5776  |
| N : GS : ploidy     | 0.041  | 0.343 | 0.121  | 0.9041  | N : GS : ploidy     | 1, 180 | 40.272  | <0.0001 |
| P : GS : ploidy     | 1.429  | 0.314 | 4.551  | <0.0001 | P : GS : ploidy     | 1, 180 | 109.699 | <0.0001 |
| N : P : GS : ploidy | 1.581  | 0.433 | 3.654  | 0.0003  | N : P : GS : ploidy | 1, 180 | 13.352  | 0.0003  |

---

**Table S9** Large GS  $\geq 3$  pg. Means, ratios, and SD per nutrient treatment for: (a) total subplot biomass; (b) total number of species per subplot, and (c) total C-weighted; (d) total S-weighted; (e) total R-weighted biomass for the four genomic groupings. See also Figs S8 and S11.

| <b>(a)</b> |                   | <b>Mean total biomass (g)</b> |                  |                   |                  | <b>Mean ratio total biomass</b> |                  |                  |  |
|------------|-------------------|-------------------------------|------------------|-------------------|------------------|---------------------------------|------------------|------------------|--|
| Treatment  | Diploid           | Diploid                       | Polyploid        | Polyploid         | Diploid          | Diploid                         | Polyploid        | Polyploid        |  |
|            | 1C < 3pg          | 1C $\geq$ 3pg                 | 1C < 3pg         | 1C $\geq$ 3pg     | 1C < 3pg         | 1C $\geq$ 3pg                   | 1C < 3pg         | 1C $\geq$ 3pg    |  |
| Control    | 7.357 $\pm$ 4.2   | 2.566 $\pm$ 1.63              | 4.153 $\pm$ 2.13 | 17.631 $\pm$ 3.55 | 0.223 $\pm$ 0.11 | 0.077 $\pm$ 0.04                | 0.127 $\pm$ 0.06 | 0.572 $\pm$ 0.17 |  |
| N          | 8.205 $\pm$ 4.79  | 2.593 $\pm$ 1.33              | 4.199 $\pm$ 3.09 | 19.473 $\pm$ 6.2  | 0.243 $\pm$ 0.15 | 0.075 $\pm$ 0.04                | 0.119 $\pm$ 0.08 | 0.562 $\pm$ 0.16 |  |
| P          | 14.651 $\pm$ 7.76 | 3.134 $\pm$ 1.78              | 3.025 $\pm$ 2.2  | 23.677 $\pm$ 6.74 | 0.317 $\pm$ 0.09 | 0.074 $\pm$ 0.05                | 0.072 $\pm$ 0.05 | 0.537 $\pm$ 0.11 |  |
| N+P        | 12.452 $\pm$ 6.96 | 2.596 $\pm$ 1.53              | 0.13 $\pm$ 0.22  | 43.184 $\pm$ 9.66 | 0.206 $\pm$ 0.11 | 0.047 $\pm$ 0.03                | 0.003 $\pm$ 0    | 0.745 $\pm$ 0.11 |  |

  

| <b>(b)</b> |            | <b>Mean total number of species</b> |           |               |                  | <b>Mean ratio species number</b> |                  |                  |  |
|------------|------------|-------------------------------------|-----------|---------------|------------------|----------------------------------|------------------|------------------|--|
| Treatment  | Diploid    | Diploid                             | Polyploid | Polyploid     | Diploid          | Diploid                          | Polyploid        | Polyploid        |  |
|            | 1C < 3pg   | 1C $\geq$ 3pg                       | 1C < 3pg  | 1C $\geq$ 3pg | 1C < 3pg         | 1C $\geq$ 3pg                    | 1C < 3pg         | 1C $\geq$ 3pg    |  |
| Control    | 14 $\pm$ 2 | 8 $\pm$ 1                           | 8 $\pm$ 1 | 10 $\pm$ 1    | 0.345 $\pm$ 0.03 | 0.196 $\pm$ 0.03                 | 0.208 $\pm$ 0.02 | 0.251 $\pm$ 0.03 |  |
| N          | 11 $\pm$ 3 | 6 $\pm$ 1                           | 5 $\pm$ 2 | 9 $\pm$ 1     | 0.34 $\pm$ 0.04  | 0.201 $\pm$ 0.03                 | 0.159 $\pm$ 0.04 | 0.3 $\pm$ 0.07   |  |
| P          | 11 $\pm$ 1 | 6 $\pm$ 1                           | 6 $\pm$ 2 | 10 $\pm$ 1    | 0.348 $\pm$ 0.04 | 0.171 $\pm$ 0.03                 | 0.168 $\pm$ 0.05 | 0.313 $\pm$ 0.03 |  |
| N+P        | 7 $\pm$ 2  | 3 $\pm$ 1                           | 6 $\pm$ 2 | 8 $\pm$ 2     | 0.358 $\pm$ 0.06 | 0.159 $\pm$ 0.05                 | 0.058 $\pm$ 0.06 | 0.425 $\pm$ 0.06 |  |

  

| <b>(c)</b> |                  | <b>C-weighted mean total biomass (g)</b> |                  |                   |                  | <b>C-weighted mean biomass ratio</b> |                  |                  |  |
|------------|------------------|------------------------------------------|------------------|-------------------|------------------|--------------------------------------|------------------|------------------|--|
| Treatment  | Diploid          | Diploid                                  | Polyploid        | Polyploid         | Diploid          | Diploid                              | Polyploid        | Polyploid        |  |
|            | 1C < 3pg         | 1C $\geq$ 3pg                            | 1C < 3pg         | 1C $\geq$ 3pg     | 1C < 3pg         | 1C $\geq$ 3pg                        | 1C < 3pg         | 1C $\geq$ 3pg    |  |
| Control    | 2.323 $\pm$ 1.39 | 0.477 $\pm$ 0.33                         | 1.15 $\pm$ 0.57  | 6.104 $\pm$ 1.08  | 0.07 $\pm$ 0.04  | 0.014 $\pm$ 0.01                     | 0.036 $\pm$ 0.02 | 0.197 $\pm$ 0.05 |  |
| N          | 2.737 $\pm$ 1.61 | 0.751 $\pm$ 0.45                         | 1.366 $\pm$ 1.04 | 7.609 $\pm$ 2.46  | 0.081 $\pm$ 0.05 | 0.021 $\pm$ 0.01                     | 0.039 $\pm$ 0.03 | 0.218 $\pm$ 0.05 |  |
| P          | 4.975 $\pm$ 3.08 | 0.936 $\pm$ 0.5                          | 0.943 $\pm$ 0.71 | 9.712 $\pm$ 3.93  | 0.106 $\pm$ 0.04 | 0.022 $\pm$ 0.01                     | 0.022 $\pm$ 0.01 | 0.212 $\pm$ 0.04 |  |
| N+P        | 5.115 $\pm$ 3.01 | 0.836 $\pm$ 0.5                          | 0.045 $\pm$ 0.08 | 23.638 $\pm$ 9.64 | 0.083 $\pm$ 0.04 | 0.015 $\pm$ 0.01                     | 0.001 $\pm$ 0    | 0.391 $\pm$ 0.1  |  |

  

| <b>(d)</b> |                  | <b>S-weighted mean total biomass (g)</b> |                  |                  |                  | <b>S-weighted mean biomass ratio</b> |                  |                  |  |
|------------|------------------|------------------------------------------|------------------|------------------|------------------|--------------------------------------|------------------|------------------|--|
| Treatment  | Diploid          | Diploid                                  | Polyploid        | Polyploid        | Diploid          | Diploid                              | Polyploid        | Polyploid        |  |
|            | 1C < 3pg         | 1C $\geq$ 3pg                            | 1C < 3pg         | 1C $\geq$ 3pg    | 1C < 3pg         | 1C $\geq$ 3pg                        | 1C < 3pg         | 1C $\geq$ 3pg    |  |
| Control    | 2.556 $\pm$ 1.38 | 1.493 $\pm$ 0.95                         | 1.817 $\pm$ 1.04 | 5.763 $\pm$ 1.24 | 0.078 $\pm$ 0.04 | 0.045 $\pm$ 0.03                     | 0.055 $\pm$ 0.03 | 0.187 $\pm$ 0.06 |  |
| N          | 2.58 $\pm$ 1.59  | 1.076 $\pm$ 0.77                         | 1.444 $\pm$ 1.06 | 5.922 $\pm$ 1.95 | 0.077 $\pm$ 0.05 | 0.032 $\pm$ 0.02                     | 0.041 $\pm$ 0.03 | 0.172 $\pm$ 0.05 |  |
| P          | 4.549 $\pm$ 1.83 | 1.245 $\pm$ 0.79                         | 1.122 $\pm$ 0.78 | 6.969 $\pm$ 1.87 | 0.101 $\pm$ 0.02 | 0.03 $\pm$ 0.02                      | 0.027 $\pm$ 0.02 | 0.162 $\pm$ 0.05 |  |
| N + P      | 2.932 $\pm$ 1.83 | 0.922 $\pm$ 0.54                         | 0.045 $\pm$ 0.08 | 9.713 $\pm$ 1.84 | 0.05 $\pm$ 0.03  | 0.017 $\pm$ 0.01                     | 0.001 $\pm$ 0    | 0.176 $\pm$ 0.06 |  |

  

| <b>(e)</b> |                  | <b>R-weighted mean total biomass (g)</b> |                  |                  |                  | <b>R-weighted mean biomass ratio</b> |                  |                  |  |
|------------|------------------|------------------------------------------|------------------|------------------|------------------|--------------------------------------|------------------|------------------|--|
| Treatment  | Diploid          | Diploid                                  | Polyploid        | Polyploid        | Diploid          | Diploid                              | Polyploid        | Polyploid        |  |
|            | 1C < 3pg         | 1C $\geq$ 3pg                            | 1C < 3pg         | 1C $\geq$ 3pg    | 1C < 3pg         | 1C $\geq$ 3pg                        | 1C < 3pg         | 1C $\geq$ 3pg    |  |
| Control    | 2.477 $\pm$ 1.44 | 0.596 $\pm$ 0.36                         | 1.185 $\pm$ 0.6  | 5.763 $\pm$ 1.24 | 0.075 $\pm$ 0.04 | 0.018 $\pm$ 0.01                     | 0.036 $\pm$ 0.02 | 0.187 $\pm$ 0.06 |  |
| N          | 2.887 $\pm$ 1.62 | 0.765 $\pm$ 0.44                         | 1.388 $\pm$ 0.99 | 5.941 $\pm$ 1.98 | 0.085 $\pm$ 0.05 | 0.022 $\pm$ 0.01                     | 0.039 $\pm$ 0.02 | 0.172 $\pm$ 0.05 |  |
| P          | 5.126 $\pm$ 2.88 | 0.953 $\pm$ 0.51                         | 0.959 $\pm$ 0.72 | 6.994 $\pm$ 1.86 | 0.11 $\pm$ 0.03  | 0.022 $\pm$ 0.01                     | 0.023 $\pm$ 0.02 | 0.163 $\pm$ 0.04 |  |
| N+P        | 4.404 $\pm$ 2.68 | 0.838 $\pm$ 0.5                          | 0.04 $\pm$ 0.06  | 9.835 $\pm$ 1.86 | 0.073 $\pm$ 0.04 | 0.015 $\pm$ 0.01                     | 0.001 $\pm$ 0    | 0.178 $\pm$ 0.06 |  |

**Table S10** Large GS  $\geq 3$  pg. Treatment contrasts and ANOVA output testing the effects and interactions of N, P, GS (small vs large, where large GS  $\geq 3$  pg), ploidy (diploid vs polyploid), on square-root transformed subplot dependent variables of: (a) total biomass; (b) total species numbers; (d) C-weighted biomass; (e) S-weighted biomass; and (f) R-weighted biomass testing for significance in treatment, GS, and ploidy. Part (c) shows multivariate ANOVA output where each C-S-R-weighted biomass are the response variables (i.e.  $n = 3$ ). Baseline levels in the contrasts are: without N, without P, diploid, and small GS for N, P, GS and ploidy effects respectively (e.g. there is a 0.2 g increase in biomass with the addition of N, relative to subplots without N).

| <b>(a) Biomass</b>  |          |            |         |          |                     |        |          |         |
|---------------------|----------|------------|---------|----------|---------------------|--------|----------|---------|
|                     | Estimate | Std. error | t-value | Pr(> t ) | ANOVA               | df     | F-value  | P-value |
| (Intercept)         | 2.582    | 0.204      | 12.662  | <0.0001  | (Intercept)         | 1, 180 | 4059.450 | <0.0001 |
| N                   | 0.130    | 0.295      | 0.442   | 0.6597   | N                   | 1, 60  | 0.180    | 0.6729  |
| P                   | 1.140    | 0.270      | 4.227   | 0.0001   | P                   | 1, 60  | 12.523   | 0.0008  |
| GS                  | -1.066   | 0.288      | -3.695  | 0.0003   | GS                  | 1, 180 | 195.728  | <0.0001 |
| ploidy              | -0.610   | 0.288      | -2.115  | 0.0358   | ploidy              | 1, 180 | 96.050   | <0.0001 |
| N : P               | -0.504   | 0.372      | -1.355  | 0.1804   | N : P               | 1, 60  | 0.556    | 0.4588  |
| N : GS              | -0.091   | 0.417      | -0.217  | 0.8283   | N : GS              | 1, 180 | 43.379   | <0.0001 |
| P : GS              | -0.967   | 0.381      | -2.535  | 0.0121   | P : GS              | 1, 180 | 21.261   | <0.0001 |
| N : ploidy          | -0.148   | 0.417      | -0.354  | 0.7237   | N : ploidy          | 1, 180 | 1.717    | 0.1917  |
| P : ploidy          | -1.487   | 0.381      | -3.899  | 0.0001   | P : ploidy          | 1, 180 | 2.370    | 0.1254  |
| GS : ploidy         | 3.273    | 0.408      | 8.025   | <0.0001  | GS : ploidy         | 1, 180 | 1044.294 | <0.0001 |
| N : P : GS          | 0.302    | 0.525      | 0.575   | 0.5662   | N : P : GS          | 1, 180 | 18.678   | <0.0001 |
| N : P : ploidy      | -0.876   | 0.525      | -1.667  | 0.0973   | N : P : ploidy      | 1, 180 | 1.327    | 0.2508  |
| N : GS : ploidy     | 0.293    | 0.590      | 0.497   | 0.62     | N : GS : ploidy     | 1, 180 | 43.361   | <0.0001 |
| P : GS : ploidy     | 1.952    | 0.539      | 3.619   | 0.0004   | P : GS : ploidy     | 1, 180 | 80.368   | <0.0001 |
| N : P : GS : ploidy | 2.608    | 0.743      | 3.509   | 0.0006   | N : P : GS : ploidy | 1, 180 | 12.313   | 0.0006  |

| <b>(b) Species number</b> |          |            |         |          |             |        |          |         |
|---------------------------|----------|------------|---------|----------|-------------|--------|----------|---------|
|                           | Estimate | Std. error | t-value | Pr(> t ) | ANOVA       | df     | F-value  | P-value |
| (Intercept)               | 3.661    | 0.113      | 32.256  | <0.0001  | (Intercept) | 1, 180 | 4875.466 | <0.0001 |
| N                         | -0.413   | 0.164      | -2.518  | 0.0145   | N           | 1, 60  | 78.190   | <0.0001 |
| P                         | -0.339   | 0.150      | -2.261  | 0.0274   | P           | 1, 60  | 43.865   | <0.0001 |
| GS                        | -0.913   | 0.124      | -7.350  | <0.0001  | GS          | 1, 180 | 13.348   | 0.0003  |
| ploidy                    | -0.825   | 0.124      | -6.643  | <0.0001  | ploidy      | 1, 180 | 40.566   | <0.0001 |
| N : P                     | -0.244   | 0.207      | -1.179  | 0.2432   | N : P       | 1, 60  | 6.066    | 0.0167  |
| N : GS                    | 0.156    | 0.180      | 0.868   | 0.3863   | N : GS      | 1, 180 | 53.523   | <0.0001 |

|                     |        |       |        |         |                     |        |         |         |
|---------------------|--------|-------|--------|---------|---------------------|--------|---------|---------|
| P : GS              | -0.069 | 0.164 | -0.420 | 0.6747  | P : GS              | 1, 180 | 25.397  | <0.0001 |
| N : ploidy          | -0.205 | 0.180 | -1.140 | 0.2557  | N : ploidy          | 1, 180 | 3.810   | 0.0525  |
| P : ploidy          | -0.190 | 0.164 | -1.158 | 0.2483  | P : ploidy          | 1, 180 | 0.118   | 0.7319  |
| GS : ploidy         | 1.184  | 0.176 | 6.739  | <0.0001 | GS : ploidy         | 1, 180 | 741.941 | <0.0001 |
| N : P : GS          | -0.071 | 0.226 | -0.312 | 0.7556  | N : P : GS          | 1, 180 | 3.160   | 0.0772  |
| N : P : ploidy      | -0.553 | 0.226 | -2.442 | 0.0156  | N : P : ploidy      | 1, 180 | 1.525   | 0.2185  |
| N : GS : ploidy     | 0.353  | 0.254 | 1.388  | 0.167   | N : GS : ploidy     | 1, 180 | 36.376  | <0.0001 |
| P : GS : ploidy     | 0.644  | 0.232 | 2.770  | 0.0062  | P : GS : ploidy     | 1, 180 | 40.567  | <0.0001 |
| N : P : GS : ploidy | 0.710  | 0.320 | 2.218  | 0.0278  | N : P : GS : ploidy | 1, 180 | 4.921   | 0.0278  |

(c) C-S-R

|                     | Estimate | Std. error | t-value | Pr(> t ) | ANOVA               | df     | F-value  | P-value |
|---------------------|----------|------------|---------|----------|---------------------|--------|----------|---------|
| (Intercept)         | 4.469    | 0.345      | 12.972  | <0.0001  | (Intercept)         | 1, 180 | 4176.040 | <0.0001 |
| N                   | 0.222    | 0.498      | 0.446   | 0.6572   | N                   | 1, 60  | 0.008    | 0.9299  |
| P                   | 1.971    | 0.456      | 4.326   | 0.0001   | P                   | 1, 60  | 11.461   | 0.0013  |
| GS                  | -1.930   | 0.487      | -3.961  | 0.0001   | GS                  | 1, 180 | 193.245  | <0.0001 |
| ploidy              | -1.080   | 0.487      | -2.217  | 0.0279   | ploidy              | 1, 180 | 94.740   | <0.0001 |
| N : P               | -0.930   | 0.628      | -1.482  | 0.1437   | N : P               | 1, 60  | 1.150    | 0.2879  |
| N : GS              | -0.104   | 0.705      | -0.148  | 0.8825   | N : GS              | 1, 180 | 42.347   | <0.0001 |
| P : GS              | -1.592   | 0.645      | -2.470  | 0.0145   | P : GS              | 1, 180 | 20.809   | <0.0001 |
| N : ploidy          | -0.227   | 0.705      | -0.322  | 0.7479   | N : ploidy          | 1, 180 | 1.106    | 0.2943  |
| P : ploidy          | -2.552   | 0.645      | -3.959  | 0.0001   | P : ploidy          | 1, 180 | 3.572    | 0.0604  |
| GS : ploidy         | 5.778    | 0.689      | 8.385   | <0.0001  | GS : ploidy         | 1, 180 | 1066.735 | <0.0001 |
| N : P : GS          | 0.537    | 0.888      | 0.605   | 0.546    | N : P : GS          | 1, 180 | 18.035   | <0.0001 |
| N : P : ploidy      | -1.479   | 0.888      | -1.666  | 0.0975   | N : P : ploidy      | 1, 180 | 1.073    | 0.3018  |
| N : GS : ploidy     | 0.413    | 0.996      | 0.415   | 0.6789   | N : GS : ploidy     | 1, 180 | 39.251   | <0.0001 |
| P : GS : ploidy     | 3.234    | 0.912      | 3.547   | 0.0005   | P : GS : ploidy     | 1, 180 | 76.339   | <0.0001 |
| N : P : GS : ploidy | 4.258    | 1.256      | 3.391   | 0.0009   | N : P : GS : ploidy | 1, 180 | 11.501   | 0.0009  |

(d) C

|             | Estimate | Std. error | t-value | Pr(> t ) | ANOVA       | df     | F-value  | P-value |
|-------------|----------|------------|---------|----------|-------------|--------|----------|---------|
| (Intercept) | 1.442    | 0.154      | 9.357   | <0.0001  | (Intercept) | 1, 180 | 2145.746 | <0.0001 |
| N           | 0.118    | 0.223      | 0.528   | 0.5991   | N           | 1, 60  | 10.156   | 0.0023  |
| P           | 0.706    | 0.204      | 3.463   | 0.001    | P           | 1, 60  | 24.380   | <0.0001 |
| GS          | -0.793   | 0.208      | -3.815  | 0.0002   | GS          | 1, 180 | 204.517  | <0.0001 |
| ploidy      | -0.403   | 0.208      | -1.940  | 0.0539   | ploidy      | 1, 180 | 134.705  | <0.0001 |
| N : P       | -0.138   | 0.281      | -0.492  | 0.6247   | N : P       | 1, 60  | 0.109    | 0.7421  |
| N : GS      | 0.068    | 0.301      | 0.228   | 0.8202   | N : GS      | 1, 180 | 49.820   | <0.0001 |

|                     |        |       |        |         |                     |        |         |         |
|---------------------|--------|-------|--------|---------|---------------------|--------|---------|---------|
| P : GS              | -0.427 | 0.275 | -1.552 | 0.1223  | P : GS              | 1, 180 | 29.332  | <0.0001 |
| N : ploidy          | -0.045 | 0.301 | -0.150 | 0.8807  | N : ploidy          | 1, 180 | 6.401   | 0.0123  |
| P : ploidy          | -0.837 | 0.275 | -3.044 | 0.0027  | P : ploidy          | 1, 180 | 0.000   | 0.9862  |
| GS : ploidy         | 2.217  | 0.294 | 7.538  | <0.0001 | GS : ploidy         | 1, 180 | 968.394 | <0.0001 |
| N : P : GS          | -0.108 | 0.379 | -0.286 | 0.7751  | N : P : GS          | 1, 180 | 16.538  | 0.0001  |
| N : P : ploidy      | -0.709 | 0.379 | -1.871 | 0.063   | N : P : ploidy      | 1, 180 | 3.332   | 0.0696  |
| N : GS : ploidy     | 0.124  | 0.425 | 0.293  | 0.7701  | N : GS : ploidy     | 1, 180 | 56.565  | <0.0001 |
| P : GS : ploidy     | 1.155  | 0.389 | 2.968  | 0.0034  | P : GS : ploidy     | 1, 180 | 81.635  | <0.0001 |
| N : P : GS : ploidy | 2.396  | 0.536 | 4.471  | <0.0001 | N : P : GS : ploidy | 1, 180 | 19.993  | <0.0001 |

(e) S

|                     | Estimate | Std. error | t-value | Pr(> t ) | ANOVA               | df     | F-value  | P-value |
|---------------------|----------|------------|---------|----------|---------------------|--------|----------|---------|
| (Intercept)         | 1.532    | 0.111      | 13.846  | <0.0001  | (Intercept)         | 1, 180 | 4157.026 | <0.0001 |
| N                   | -0.011   | 0.160      | -0.072  | 0.9432   | N                   | 1, 60  | 14.683   | 0.0003  |
| P                   | 0.565    | 0.146      | 3.863   | 0.0003   | P                   | 1, 60  | 0.028    | 0.8686  |
| GS                  | -0.376   | 0.156      | -2.401  | 0.0174   | GS                  | 1, 180 | 179.992  | <0.0001 |
| ploidy              | -0.234   | 0.156      | -1.498  | 0.1358   | ploidy              | 1, 180 | 62.095   | <0.0001 |
| N : P               | -0.462   | 0.202      | -2.292  | 0.0254   | N : P               | 1, 60  | 2.762    | 0.1017  |
| N : GS              | -0.167   | 0.226      | -0.738  | 0.4612   | N : GS              | 1, 180 | 34.986   | <0.0001 |
| P : GS              | -0.665   | 0.207      | -3.212  | 0.0016   | P : GS              | 1, 180 | 13.983   | 0.0002  |
| N : ploidy          | -0.139   | 0.226      | -0.613  | 0.5406   | N : ploidy          | 1, 180 | 0.415    | 0.5203  |
| P : ploidy          | -0.875   | 0.207      | -4.228  | <0.0001  | P : ploidy          | 1, 180 | 4.860    | 0.0288  |
| GS : ploidy         | 1.466    | 0.221      | 6.623   | <0.0001  | GS : ploidy         | 1, 180 | 789.182  | <0.0001 |
| N : P : GS          | 0.493    | 0.285      | 1.728   | 0.0857   | N : P : GS          | 1, 180 | 17.068   | 0.0001  |
| N : P : ploidy      | -0.244   | 0.285      | -0.855  | 0.3934   | N : P : ploidy      | 1, 180 | 0.228    | 0.6334  |
| N : GS : ploidy     | 0.335    | 0.320      | 1.047   | 0.2964   | N : GS : ploidy     | 1, 180 | 24.492   | <0.0001 |
| P : GS : ploidy     | 1.205    | 0.293      | 4.116   | 0.0001   | P : GS : ploidy     | 1, 180 | 60.296   | <0.0001 |
| N : P : GS : ploidy | 0.681    | 0.403      | 1.688   | 0.0932   | N : P : GS : ploidy | 1, 180 | 2.848    | 0.0932  |

(f) R

|             | S        | t          | P      | ANOVA   | df          | F-value | P-value  |         |
|-------------|----------|------------|--------|---------|-------------|---------|----------|---------|
|             | estimate | std. error | -value | r(> t ) |             |         |          |         |
| (Intercept) | 1.495    | 0.116      | 12.884 | <0.0001 | (Intercept) | 1, 180  | 3734.925 | <0.0001 |
| N           | 0.116    | 0.168      | 0.690  | 0.4925  | N           | 1, 60   | 0.722    | 0.399   |
| P           | 0.700    | 0.154      | 4.561  | <0.0001 | P           | 1, 60   | 6.297    | 0.0148  |
| GS          | -0.761   | 0.164      | -4.637 | <0.0001 | GS          | 1, 180  | 107.337  | <0.0001 |
| ploidy      | -0.442   | 0.164      | -2.695 | 0.0077  | ploidy      | 1, 180  | 44.613   | <0.0001 |
| N : P       | -0.330   | 0.212      | -1.561 | 0.1238  | N : P       | 1, 60   | 4.380    | 0.0406  |

|                     |        |       |        |         |                     |        |         |         |
|---------------------|--------|-------|--------|---------|---------------------|--------|---------|---------|
| N : GS              | -0.006 | 0.237 | -0.024 | 0.9811  | N : GS              | 1, 180 | 22.444  | <0.0001 |
| P : GS              | -0.500 | 0.217 | -2.303 | 0.0224  | P : GS              | 1, 180 | 9.709   | 0.0021  |
| N : ploidy          | -0.043 | 0.237 | -0.181 | 0.8568  | N : ploidy          | 1, 180 | 0.486   | 0.4868  |
| P : ploidy          | -0.839 | 0.217 | -3.866 | 0.0002  | P : ploidy          | 1, 180 | 12.160  | 0.0006  |
| GS : ploidy         | 2.095  | 0.232 | 9.027  | <0.0001 | GS : ploidy         | 1, 180 | 945.730 | <0.0001 |
| N : P : GS          | 0.153  | 0.299 | 0.511  | 0.61    | N : P : GS          | 1, 180 | 12.367  | 0.0006  |
| N : P : ploidy      | -0.526 | 0.299 | -1.759 | 0.0803  | N : P : ploidy      | 1, 180 | 0.094   | 0.7597  |
| N : GS : ploidy     | -0.046 | 0.336 | -0.138 | 0.8902  | N : GS : ploidy     | 1, 180 | 18.946  | <0.0001 |
| P : GS : ploidy     | 0.874  | 0.307 | 2.847  | 0.0049  | P : GS : ploidy     | 1, 180 | 50.246  | <0.0001 |
| N : P : GS : ploidy | 1.182  | 0.423 | 2.794  | 0.0058  | N : P : GS : ploidy | 1, 180 | 7.807   | 0.0058  |

**Table S11** Large GS  $\geq 6$  pg. Means, ratios, and SD per nutrient treatment for: (a) total subplot biomass; (b) total number of species per subplot, and (c) total C-weighted; (d) total S-weighted; (e) total R-weighted biomass for the four genomic groupings. See also Figs S9 and S12.

| <b>(a) Mean total biomass (g)</b> |                   |                  |                   |                   | <b>Mean ratio total biomass</b> |                  |                  |                  |
|-----------------------------------|-------------------|------------------|-------------------|-------------------|---------------------------------|------------------|------------------|------------------|
| Treatment                         | Diploid           | Diploid          | Polyploid         | Polyploid         | Diploid                         | Diploid          | Polyploid        | Polyploid        |
|                                   | 1C < 6pg          | 1C $\geq$ 6pg    | 1C < 6pg          | 1C $\geq$ 6pg     | 1C < 6pg                        | 1C $\geq$ 6pg    | 1C < 6pg         | 1C $\geq$ 6pg    |
| Control                           | 8.961 $\pm$ 4.99  | 0.962 $\pm$ 1.03 | 12.061 $\pm$ 2.41 | 9.722 $\pm$ 2.02  | 0.273 $\pm$ 0.14                | 0.027 $\pm$ 0.03 | 0.385 $\pm$ 0.09 | 0.314 $\pm$ 0.09 |
| N                                 | 9.928 $\pm$ 4.73  | 0.87 $\pm$ 1.07  | 14.929 $\pm$ 6.01 | 8.743 $\pm$ 3.8   | 0.292 $\pm$ 0.15                | 0.027 $\pm$ 0.03 | 0.425 $\pm$ 0.13 | 0.257 $\pm$ 0.12 |
| P                                 | 17.237 $\pm$ 8.61 | 0.548 $\pm$ 0.59 | 11.801 $\pm$ 6.89 | 14.901 $\pm$ 6.19 | 0.377 $\pm$ 0.11                | 0.014 $\pm$ 0.02 | 0.282 $\pm$ 0.16 | 0.327 $\pm$ 0.06 |
| N+P                               | 14.845 $\pm$ 6.91 | 0.203 $\pm$ 0.35 | 8.962 $\pm$ 4.06  | 34.352 $\pm$ 10.3 | 0.249 $\pm$ 0.1                 | 0.004 $\pm$ 0.01 | 0.163 $\pm$ 0.09 | 0.584 $\pm$ 0.11 |

  

| <b>(b) Mean total number of species</b> |            |               |            |               | <b>Mean ratio species number</b> |                  |                  |                  |
|-----------------------------------------|------------|---------------|------------|---------------|----------------------------------|------------------|------------------|------------------|
| Treatment                               | Diploid    | Diploid       | Polyploid  | Polyploid     | Diploid                          | Diploid          | Polyploid        | Polyploid        |
|                                         | 1C < 6pg   | 1C $\geq$ 6pg | 1C < 6pg   | 1C $\geq$ 6pg | 1C < 6pg                         | 1C $\geq$ 6pg    | 1C < 6pg         | 1C $\geq$ 6pg    |
| Control                                 | 20 $\pm$ 3 | 1 $\pm$ 0     | 11 $\pm$ 2 | 6 $\pm$ 1     | 0.516 $\pm$ 0.04                 | 0.026 $\pm$ 0    | 0.29 $\pm$ 0.03  | 0.168 $\pm$ 0.02 |
| N                                       | 16 $\pm$ 4 | 1 $\pm$ 0     | 8 $\pm$ 2  | 6 $\pm$ 1     | 0.503 $\pm$ 0.05                 | 0.039 $\pm$ 0.01 | 0.268 $\pm$ 0.02 | 0.191 $\pm$ 0.05 |
| P                                       | 16 $\pm$ 2 | 1 $\pm$ 0     | 9 $\pm$ 2  | 7 $\pm$ 0     | 0.486 $\pm$ 0.03                 | 0.034 $\pm$ 0.01 | 0.266 $\pm$ 0.04 | 0.215 $\pm$ 0.02 |
| N+P                                     | 10 $\pm$ 3 | 1 $\pm$ 1     | 4 $\pm$ 1  | 5 $\pm$ 2     | 0.48 $\pm$ 0.05                  | 0.038 $\pm$ 0.03 | 0.218 $\pm$ 0.05 | 0.265 $\pm$ 0.04 |

  

| <b>(c) C-weighted mean total biomass (g)</b> |                  |                  |                  |                  | <b>C-weighted mean biomass ratio</b> |                  |                  |                  |
|----------------------------------------------|------------------|------------------|------------------|------------------|--------------------------------------|------------------|------------------|------------------|
| Treatment                                    | Diploid          | Diploid          | Polyploid        | Polyploid        | Diploid                              | Diploid          | Polyploid        | Polyploid        |
|                                              | 1C < 6pg         | 1C $\geq$ 6pg    | 1C < 6pg         | 1C $\geq$ 6pg    | 1C < 6pg                             | 1C $\geq$ 6pg    | 1C < 6pg         | 1C $\geq$ 6pg    |
| Control                                      | 2.64 $\pm$ 1.57  | 0.16 $\pm$ 0.17  | 4.069 $\pm$ 0.85 | 3.185 $\pm$ 0.67 | 0.08 $\pm$ 0.04                      | 0.005 $\pm$ 0    | 0.13 $\pm$ 0.03  | 0.103 $\pm$ 0.03 |
| N                                            | 3.344 $\pm$ 1.59 | 0.144 $\pm$ 0.18 | 5.836 $\pm$ 2.39 | 3.138 $\pm$ 1.23 | 0.098 $\pm$ 0.05                     | 0.004 $\pm$ 0.01 | 0.165 $\pm$ 0.05 | 0.092 $\pm$ 0.04 |
| P                                            | 5.82 $\pm$ 3.37  | 0.091 $\pm$ 0.1  | 4.361 $\pm$ 2.45 | 6.294 $\pm$ 3.9  | 0.125 $\pm$ 0.04                     | 0.002 $\pm$ 0    | 0.102 $\pm$ 0.05 | 0.132 $\pm$ 0.05 |
| N+P                                          | 5.918 $\pm$ 3.04 | 0.034 $\pm$ 0.06 | 4.134 $\pm$ 1.83 | 19.548 $\pm$ 9.1 | 0.097 $\pm$ 0.04                     | 0.001 $\pm$ 0    | 0.072 $\pm$ 0.03 | 0.32 $\pm$ 0.1   |

  

| <b>(d) S-weighted mean total biomass (g)</b> |                  |                  |                  |                  | <b>S-weighted mean biomass ratio</b> |                  |                  |                  |
|----------------------------------------------|------------------|------------------|------------------|------------------|--------------------------------------|------------------|------------------|------------------|
| Treatment                                    | Diploid          | Diploid          | Polyploid        | Polyploid        | Diploid                              | Diploid          | Polyploid        | Polyploid        |
|                                              | 1C < 6pg         | 1C $\geq$ 6pg    | 1C < 6pg         | 1C $\geq$ 6pg    | 1C < 6pg                             | 1C $\geq$ 6pg    | 1C < 6pg         | 1C $\geq$ 6pg    |
| Control                                      | 3.408 $\pm$ 1.78 | 0.641 $\pm$ 0.68 | 4.312 $\pm$ 0.86 | 3.268 $\pm$ 0.68 | 0.104 $\pm$ 0.05                     | 0.018 $\pm$ 0.02 | 0.137 $\pm$ 0.03 | 0.106 $\pm$ 0.03 |
| N                                            | 3.077 $\pm$ 1.62 | 0.579 $\pm$ 0.72 | 4.574 $\pm$ 1.86 | 2.793 $\pm$ 1.29 | 0.091 $\pm$ 0.05                     | 0.018 $\pm$ 0.02 | 0.131 $\pm$ 0.04 | 0.082 $\pm$ 0.04 |
| P                                            | 5.43 $\pm$ 2.12  | 0.365 $\pm$ 0.39 | 3.801 $\pm$ 2.23 | 4.291 $\pm$ 1.27 | 0.121 $\pm$ 0.03                     | 0.009 $\pm$ 0.01 | 0.092 $\pm$ 0.05 | 0.097 $\pm$ 0.02 |
| N + P                                        | 3.718 $\pm$ 1.72 | 0.136 $\pm$ 0.23 | 2.416 $\pm$ 1.41 | 7.342 $\pm$ 1.59 | 0.065 $\pm$ 0.03                     | 0.003 $\pm$ 0    | 0.046 $\pm$ 0.03 | 0.131 $\pm$ 0.04 |

  

| <b>(e) R-weighted mean total biomass (g)</b> |                  |                  |                  |                  | <b>R-weighted mean biomass ratio</b> |                  |                  |                  |
|----------------------------------------------|------------------|------------------|------------------|------------------|--------------------------------------|------------------|------------------|------------------|
| Treatment                                    | Diploid          | Diploid          | Polyploid        | Polyploid        | Diploid                              | Diploid          | Polyploid        | Polyploid        |
|                                              | 1C < 6pg         | 1C $\geq$ 6pg    | 1C < 6pg         | 1C $\geq$ 6pg    | 1C < 6pg                             | 1C $\geq$ 6pg    | 1C < 6pg         | 1C $\geq$ 6pg    |
| Control                                      | 2.914 $\pm$ 1.65 | 0.16 $\pm$ 0.17  | 3.68 $\pm$ 0.86  | 3.268 $\pm$ 0.68 | 0.089 $\pm$ 0.04                     | 0.005 $\pm$ 0    | 0.118 $\pm$ 0.03 | 0.106 $\pm$ 0.03 |
| N                                            | 3.507 $\pm$ 1.6  | 0.146 $\pm$ 0.18 | 4.518 $\pm$ 1.83 | 2.812 $\pm$ 1.31 | 0.103 $\pm$ 0.05                     | 0.004 $\pm$ 0.01 | 0.129 $\pm$ 0.04 | 0.083 $\pm$ 0.04 |
| P                                            | 5.986 $\pm$ 3.16 | 0.092 $\pm$ 0.1  | 3.638 $\pm$ 2.27 | 4.316 $\pm$ 1.3  | 0.13 $\pm$ 0.04                      | 0.002 $\pm$ 0    | 0.087 $\pm$ 0.05 | 0.098 $\pm$ 0.02 |
| N+P                                          | 5.208 $\pm$ 2.67 | 0.034 $\pm$ 0.06 | 2.412 $\pm$ 1.41 | 7.464 $\pm$ 1.65 | 0.087 $\pm$ 0.04                     | 0.001 $\pm$ 0    | 0.046 $\pm$ 0.03 | 0.133 $\pm$ 0.04 |



**Table S12** Large GS  $\geq 6$  pg. Treatment contrasts and ANOVA output testing the effects and interactions of N, P, GS (small vs large, where large GS  $\geq 6$  pg), ploidy (diploid vs polyploid), on subplot: (a) total biomass; (b) total species numbers; (d) C-weighted biomass; (e) S-weighted biomass; and (f) R-weighted biomass testing for significance in treatment, GS, and ploidy. Dependent variables were square-root transformed. Part (c) shows multivariate ANOVA output where each C-S-R-weighted biomass are the response variables (i.e.  $n = 3$ ). Baseline levels in the contrasts are: without N, without P, diploid, and small GS for N, P, GS and ploidy effects respectively (e.g. there is a 0.2 g increase in biomass with the addition of N, relative to subplots without N).

| <b>(a) Biomass</b>  |          |            |         |          |                     |        |          |         |
|---------------------|----------|------------|---------|----------|---------------------|--------|----------|---------|
|                     | Estimate | Std. error | t-value | Pr(> t ) | ANOVA               | df     | F-value  | P-value |
| (Intercept)         | 2.866    | 0.209      | 13.711  | <0.0001  | (Intercept)         | 1, 180 | 4150.617 | <0.0001 |
| N                   | 0.173    | 0.302      | 0.571   | 0.5699   | N                   | 1, 60  | 6.504    | 0.0133  |
| P                   | 1.181    | 0.277      | 4.270   | 0.0001   | P                   | 1, 60  | 25.505   | <0.0001 |
| GS                  | -2.020   | 0.296      | -6.833  | <0.0001  | GS                  | 1, 180 | 115.179  | <0.0001 |
| ploidy              | 0.591    | 0.296      | 1.998   | 0.0472   | ploidy              | 1, 180 | 365.676  | <0.0001 |
| N : P               | -0.480   | 0.381      | -1.259  | 0.2128   | N : P               | 1, 60  | 0.996    | 0.3222  |
| N : GS              | -0.265   | 0.427      | -0.619  | 0.5366   | N : GS              | 1, 180 | 12.943   | 0.0004  |
| P : GS              | -1.379   | 0.391      | -3.525  | 0.0005   | P : GS              | 1, 180 | 8.740    | 0.0035  |
| N : ploidy          | 0.167    | 0.427      | 0.390   | 0.6966   | N : ploidy          | 1, 180 | 17.981   | <0.0001 |
| P : ploidy          | -1.334   | 0.391      | -3.410  | 0.0008   | P : ploidy          | 1, 180 | 3.674    | 0.0569  |
| GS : ploidy         | 1.665    | 0.418      | 3.982   | 0.0001   | GS : ploidy         | 1, 180 | 484.650  | <0.0001 |
| N : P : GS          | 0.225    | 0.539      | 0.418   | 0.6766   | N : P : GS          | 1, 180 | 17.100   | 0.0001  |
| N : P : ploidy      | -0.236   | 0.539      | -0.437  | 0.6625   | N : P : ploidy      | 1, 180 | 8.563    | 0.0039  |
| N : GS : ploidy     | -0.280   | 0.605      | -0.463  | 0.6441   | N : GS : ploidy     | 1, 180 | 26.225   | <0.0001 |
| P : GS : ploidy     | 2.221    | 0.553      | 4.017   | 0.0001   | P : GS : ploidy     | 1, 180 | 91.794   | <0.0001 |
| N : P : GS : ploidy | 2.700    | 0.762      | 3.544   | 0.0005   | N : P : GS : ploidy | 1, 180 | 12.563   | 0.0005  |

| <b>(b) Species number</b> |          |            |         |          |             |        |          |         |
|---------------------------|----------|------------|---------|----------|-------------|--------|----------|---------|
|                           | Estimate | Std. error | t-value | Pr(> t ) | ANOVA       | df     | F-value  | P-value |
| (Intercept)               | 4.470    | 0.097      | 46.096  | <0.0001  | (Intercept) | 1, 180 | 6640.214 | <0.0001 |
| N                         | -0.522   | 0.140      | -3.724  | 0.0004   | N           | 1, 60  | 71.515   | <0.0001 |
| P                         | -0.534   | 0.128      | -4.162  | 0.0001   | P           | 1, 60  | 36.793   | <0.0001 |
| GS                        | -3.470   | 0.111      | -31.120 | <0.0001  | GS          | 1, 180 | 1944.982 | <0.0001 |
| ploidy                    | -1.123   | 0.111      | -10.077 | <0.0001  | ploidy      | 1, 180 | 46.763   | <0.0001 |
| N : P                     | -0.320   | 0.177      | -1.812  | 0.0751   | N : P       | 1, 60  | 5.919    | 0.018   |
| N : GS                    | 0.597    | 0.161      | 3.706   | 0.0003   | N : GS      | 1, 180 | 71.875   | <0.0001 |
| P : GS                    | 0.560    | 0.147      | 3.795   | 0.0002   | P : GS      | 1, 180 | 64.411   | <0.0001 |
| N : ploidy                | 0.051    | 0.161      | 0.319   | 0.7498   | N : ploidy  | 1, 180 | 0.211    | 0.6468  |

|                     |        |       |        |         |                     |        |          |         |
|---------------------|--------|-------|--------|---------|---------------------|--------|----------|---------|
| P : ploidy          | 0.103  | 0.147 | 0.696  | 0.4874  | P : ploidy          | 1, 180 | 2.303    | 0.1308  |
| GS : ploidy         | 2.670  | 0.158 | 16.932 | <0.0001 | GS : ploidy         | 1, 180 | 1420.937 | <0.0001 |
| N : P : GS          | -0.045 | 0.203 | -0.219 | 0.8267  | N : P : GS          | 1, 180 | 0.415    | 0.5201  |
| N : P : ploidy      | -0.063 | 0.203 | -0.310 | 0.7572  | N : P : ploidy      | 1, 180 | 0.267    | 0.6061  |
| N : GS : ploidy     | -0.286 | 0.228 | -1.256 | 0.2107  | N : GS : ploidy     | 1, 180 | 0.571    | 0.4507  |
| P : GS : ploidy     | -0.066 | 0.209 | -0.315 | 0.7529  | P : GS : ploidy     | 1, 180 | 0.301    | 0.5837  |
| N : P : GS : ploidy | 0.274  | 0.287 | 0.954  | 0.3411  | N : P : GS : ploidy | 1, 180 | 0.911    | 0.3411  |

**(c) C-S-R**

|                     | Estimate | Std. error | t-value | Pr(> t ) | ANOVA               | df     | F-value  | P-value |
|---------------------|----------|------------|---------|----------|---------------------|--------|----------|---------|
| (Intercept)         | 4.953    | 0.352      | 14.090  | <0.0001  | (Intercept)         | 1, 180 | 4290.323 | <0.0001 |
| N                   | 0.302    | 0.508      | 0.594   | 0.5545   | N                   | 1, 60  | 4.866    | 0.0312  |
| P                   | 2.051    | 0.465      | 4.411   | <0.0001  | P                   | 1, 60  | 23.654   | <0.0001 |
| GS                  | -3.571   | 0.497      | -7.183  | <0.0001  | GS                  | 1, 180 | 132.048  | <0.0001 |
| ploidy              | 1.028    | 0.497      | 2.067   | 0.0402   | ploidy              | 1, 180 | 375.223  | <0.0001 |
| N : P               | -0.879   | 0.641      | -1.372  | 0.1751   | N : P               | 1, 60  | 0.549    | 0.4614  |
| N : GS              | -0.452   | 0.719      | -0.629  | 0.5303   | N : GS              | 1, 180 | 12.562   | 0.0005  |
| P : GS              | -2.374   | 0.658      | -3.610  | 0.0004   | P : GS              | 1, 180 | 8.331    | 0.0044  |
| N : ploidy          | 0.278    | 0.719      | 0.387   | 0.6993   | N : ploidy          | 1, 180 | 15.594   | 0.0001  |
| P : ploidy          | -2.323   | 0.658      | -3.532  | 0.0005   | P : ploidy          | 1, 180 | 2.540    | 0.1127  |
| GS : ploidy         | 2.962    | 0.703      | 4.214   | <0.0001  | GS : ploidy         | 1, 180 | 503.693  | <0.0001 |
| N : P : GS          | 0.462    | 0.906      | 0.511   | 0.6103   | N : P : GS          | 1, 180 | 17.141   | 0.0001  |
| N : P : ploidy      | -0.419   | 0.906      | -0.463  | 0.6441   | N : P : ploidy      | 1, 180 | 7.638    | 0.0063  |
| N : GS : ploidy     | -0.488   | 1.017      | -0.480  | 0.6319   | N : GS : ploidy     | 1, 180 | 24.229   | <0.0001 |
| P : GS : ploidy     | 3.799    | 0.930      | 4.085   | 0.0001   | P : GS : ploidy     | 1, 180 | 91.136   | <0.0001 |
| N : P : GS : ploidy | 4.379    | 1.281      | 3.418   | 0.0008   | N : P : GS : ploidy | 1, 180 | 11.684   | 0.0008  |

**(d) C**

|             | Estimate | Std. error | t-value | Pr(> t ) | ANOVA       | df     | F-value  | P-value |
|-------------|----------|------------|---------|----------|-------------|--------|----------|---------|
| (Intercept) | 1.543    | 0.158      | 9.780   | <0.0001  | (Intercept) | 1, 180 | 2303.550 | <0.0001 |
| N           | 0.217    | 0.228      | 0.950   | 0.346    | N           | 1, 60  | 24.675   | <0.0001 |
| P           | 0.789    | 0.209      | 3.780   | 0.0004   | P           | 1, 60  | 39.104   | <0.0001 |
| GS          | -1.197   | 0.214      | -5.596  | <0.0001  | GS          | 1, 180 | 59.277   | <0.0001 |
| ploidy      | 0.464    | 0.214      | 2.169   | 0.0314   | ploidy      | 1, 180 | 412.279  | <0.0001 |
| N : P       | -0.207   | 0.287      | -0.719  | 0.4748   | N : P       | 1, 60  | 3.626    | 0.0617  |
| N : GS      | -0.255   | 0.309      | -0.824  | 0.411    | N : GS      | 1, 180 | 14.184   | 0.0002  |
| P : GS      | -0.871   | 0.283      | -3.076  | 0.0024   | P : GS      | 1, 180 | 14.040   | 0.0002  |
| N : ploidy  | 0.149    | 0.309      | 0.482   | 0.6302   | N : ploidy  | 1, 180 | 28.980   | <0.0001 |
| P : ploidy  | -0.778   | 0.283      | -2.748  | 0.0066   | P : ploidy  | 1, 180 | 10.942   | 0.0011  |

|                     |        |       |        |        |                     |        |         |         |
|---------------------|--------|-------|--------|--------|---------------------|--------|---------|---------|
| GS : ploidy         | 0.965  | 0.303 | 3.190  | 0.0017 | GS : ploidy         | 1, 180 | 426.734 | <0.0001 |
| N : P : GS          | 0.105  | 0.390 | 0.268  | 0.7889 | N : P : GS          | 1, 180 | 19.245  | <0.0001 |
| N : P : ploidy      | -0.186 | 0.390 | -0.478 | 0.6332 | N : P : ploidy      | 1, 180 | 11.100  | 0.001   |
| N : GS : ploidy     | -0.145 | 0.438 | -0.332 | 0.7402 | N : GS : ploidy     | 1, 180 | 35.499  | <0.0001 |
| P : GS : ploidy     | 1.499  | 0.400 | 3.743  | 0.0002 | P : GS : ploidy     | 1, 180 | 93.559  | <0.0001 |
| N : P : GS : ploidy | 2.210  | 0.551 | 4.008  | 0.0001 | N : P : GS : ploidy | 1, 180 | 16.061  | 0.0001  |

**(e) S**

|                     | Estimate | Std. error | t-value | Pr(> t ) | ANOVA               | df     | F-value  | P-value |
|---------------------|----------|------------|---------|----------|---------------------|--------|----------|---------|
| (Intercept)         | 1.779    | 0.113      | 15.761  | <0.0001  | (Intercept)         | 1, 180 | 4258.283 | <0.0001 |
| N                   | -0.093   | 0.163      | -0.568  | 0.5722   | N                   | 1, 60  | 2.876    | 0.0951  |
| P                   | 0.513    | 0.149      | 3.433   | 0.0011   | P                   | 1, 60  | 2.783    | 0.1005  |
| GS                  | -1.088   | 0.160      | -6.818  | <0.0001  | GS                  | 1, 180 | 123.331  | <0.0001 |
| ploidy              | 0.287    | 0.160      | 1.799   | 0.0737   | ploidy              | 1, 180 | 264.659  | <0.0001 |
| N : P               | -0.319   | 0.206      | -1.551  | 0.1261   | N : P               | 1, 60  | 0.089    | 0.7663  |
| N : GS              | 0.017    | 0.231      | 0.075   | 0.9405   | N : GS              | 1, 180 | 12.874   | 0.0004  |
| P : GS              | -0.675   | 0.211      | -3.195  | 0.0017   | P : GS              | 1, 180 | 5.309    | 0.0224  |
| N : ploidy          | 0.127    | 0.231      | 0.550   | 0.5833   | N : ploidy          | 1, 180 | 10.769   | 0.0012  |
| P : ploidy          | -0.711   | 0.211      | -3.365  | 0.0009   | P : ploidy          | 1, 180 | 0.910    | 0.3414  |
| GS : ploidy         | 0.820    | 0.226      | 3.633   | 0.0004   | GS : ploidy         | 1, 180 | 357.551  | <0.0001 |
| N : P : GS          | 0.112    | 0.291      | 0.385   | 0.7006   | N : P : GS          | 1, 180 | 10.285   | 0.0016  |
| N : P : ploidy      | -0.083   | 0.291      | -0.285  | 0.776    | N : P : ploidy      | 1, 180 | 5.104    | 0.0251  |
| N : GS : ploidy     | -0.216   | 0.326      | -0.663  | 0.5083   | N : GS : ploidy     | 1, 180 | 12.012   | 0.0007  |
| P : GS : ploidy     | 1.127    | 0.299      | 3.775   | 0.0002   | P : GS : ploidy     | 1, 180 | 68.859   | <0.0001 |
| N : P : GS : ploidy | 1.095    | 0.411      | 2.662   | 0.0085   | N : P : GS : ploidy | 1, 180 | 7.088    | 0.0085  |

**(f) R**

|             | Estimate | Std. error | t-value | Pr(> t ) | ANOVA       | df     | F-value  | P-value |
|-------------|----------|------------|---------|----------|-------------|--------|----------|---------|
| (Intercept) | 1.630    | 0.115      | 14.152  | <0.0001  | (Intercept) | 1, 180 | 3932.601 | <0.0001 |
| N           | 0.178    | 0.167      | 1.069   | 0.2892   | N           | 1, 60  | 0.668    | 0.4171  |
| P           | 0.749    | 0.152      | 4.917   | <0.0001  | P           | 1, 60  | 13.456   | 0.0005  |
| GS          | -1.285   | 0.163      | -7.886  | <0.0001  | GS          | 1, 180 | 197.863  | <0.0001 |
| ploidy      | 0.276    | 0.163      | 1.695   | 0.0918   | ploidy      | 1, 180 | 272.001  | <0.0001 |
| N : P       | -0.353   | 0.210      | -1.682  | 0.0978   | N : P       | 1, 60  | 0.122    | 0.7279  |
| N : GS      | -0.214   | 0.236      | -0.909  | 0.3645   | N : GS      | 1, 180 | 5.530    | 0.0198  |
| P : GS      | -0.828   | 0.216      | -3.842  | 0.0002   | P : GS      | 1, 180 | 2.649    | 0.1054  |
| N : ploidy  | 0.002    | 0.236      | 0.009   | 0.9931   | N : ploidy  | 1, 180 | 3.106    | 0.0797  |
| P : ploidy  | -0.834   | 0.216      | -3.869  | 0.0002   | P : ploidy  | 1, 180 | 0.173    | 0.6777  |
| GS : ploidy | 1.177    | 0.230      | 5.107   | <0.0001  | GS : ploidy | 1, 180 | 520.549  | <0.0001 |

|                     |        |       |        |        |                     |        |        |         |
|---------------------|--------|-------|--------|--------|---------------------|--------|--------|---------|
| N : P : GS          | 0.246  | 0.297 | 0.828  | 0.4087 | N : P : GS          | 1, 180 | 13.896 | 0.0003  |
| N : P : ploidy      | -0.150 | 0.297 | -0.505 | 0.6144 | N : P : ploidy      | 1, 180 | 3.397  | 0.067   |
| N : GS : ploidy     | -0.126 | 0.333 | -0.379 | 0.7055 | N : GS : ploidy     | 1, 180 | 14.417 | 0.0002  |
| P : GS : ploidy     | 1.173  | 0.305 | 3.847  | 0.0002 | P : GS : ploidy     | 1, 180 | 68.758 | <0.0001 |
| N : P : GS : ploidy | 1.074  | 0.420 | 2.557  | 0.0114 | N : P : GS : ploidy | 1, 180 | 6.537  | 0.0114  |

**Methods S1** Phylogenetic tree of species present at Park Grass, used to estimate the correlation structure in phylogenetic generalised mixed model and *pgls* analyses, in Newick format.

```
((((((((((((PT:1.0,PP:1.0):1.0,HP:2.0):1.0,AP:3.0):1.0,DC:4.0):4.0,(CR:3.0,(FR:2.0,(LM:1.0,FP:1.0):1.0):1.0):5.0):1.0,DG:9.0):1.0,HL:10.0):5.0,((BM:1.0,AO:1.0):3.0,(AC:2.0,(TF:1.0,AE:1.0):1.0):2.0):11.0):1.0,BH:16.0):3.0,(LC:2.0,(CY:1.0,CX:1.0):1.0):17.0):1.0,FM:20.0):39.0,(((RB:1.0,RA:1.0):1.0,RU:2.0):1.0,RF:3.0):35.0,((((((TR:1.0,TP:1.0):1.0,OR:2.0):1.0,LP:3.0):1.0,LO:4.0):3.0,(AU:2.0,(SM:1.0,PX:1.0):1.0):5.0):2.0,(VR:1.0,QR:1.0):8.0):25.0,(((SG:1.0,CF:1.0):1.0,RC:2.0):22.0,(PV:21.0,(((SO:1.0,PZ:1.0):1.0,AR:2.0):2.0,(VC:1.0,PL:1.0):3.0):1.0,GV:5.0):15.0,(((PS:1.0,HS:1.0):1.0,CM:2.0):1.0,AS:3.0):1.0,KA:4.0):10.0,(BP:9.0,(AM:8.0,(CN:7.0,(TG:6.0,(HI:5.0,((TO:1.0,CC:1.0):3.0,(LH:2.0,(LA:1.0,HR:1.0):1.0):2.0):1.0):1.0):1.0):1.0):1.0):5.0):6.0):1.0):3.0):10.0):4.0):21.0):1.0,OV:60.0);
```

## References

- Albach DC, Greilhuber J. 2004.** Genome size variation and evolution in *Veronica*. *Annals of Botany* **94**: 897–911.
- Barow M, Meister A. 2003.** Endopolyploidy in seed plants is differently correlated to systematics, organ, life strategy and genome size. *Plant, Cell & Environment* **26**: 571–584.
- Bennett MD, Leitch IJ. 2012.** *Plant DNA C-values database (release 6.0, Dec. 2012)*. URL <http://data.kew.org/cvalues/>
- Bennett MD, Smith JB, Lewis Smith RI. 1982.** DNA amounts of angiosperms from the Antarctic and South Georgia. *Environmental and Experimental Botany* **22**: 307–318.
- Cerbah M, Coulaud J, Brown SC, Siljak-Yakovlev S. 1999.** Evolutionary DNA variation in the genus *Hypochaeris*. *Heredity* **82**: 261–266.
- Crawley MJ, Johnston AE, Silvertown J, Dodd M, de Mazancourt C, Heard MS, Henman DF, Edwards GR. 2005.** Determinants of species richness in the Park Grass Experiment. *The American Naturalist* **165**: 179–192.
- Evans GM, Rees H, Snell CL, Sun S. 1972.** The relationship between nuclear DNA amount and the duration of the mitotic cycle. *Chromosomes Today* **3**: 24–31.
- Favre JM, Brown S. 1996.** A flow cytometric evaluation of the nuclear DNA content and GC percent in genomes of European oak species. *Annales des Sciences Forestieres* **53**: 915–917.
- Grime JP, Shacklock JML, Band SR. 1985.** Nuclear DNA contents, shoot phenology and species co-existence in a limestone grassland community. *New Phytologist* **100**: 435–445.
- Leitch IJ, Beaulieu JM, Cheung K, Hanson L, Lysak M, Fay MF. 2007.** Punctuated genome size evolution in Liliaceae. *Journal of Evolutionary Biology* **20**: 2296–2308.

- Mowforth MA. 1986.** *Variation in nuclear DNA amounts in flowering plants: an ecological analysis.* PhD thesis, University of Sheffield, Sheffield, UK.
- Murray BG, De Lange PJ, Ferguson AR. 2005.** Nuclear DNA variation, chromosome numbers and polyploidy in the endemic and indigenous grass flora of New Zealand. *Annals of Botany* **96**: 1293–1305.
- Olszewska MJ, Osiecka R. 1982.** The relationship between 2C DNA content, life-cycle type, systematic position, and the level of DNA endoreplication in nuclei of parenchyma cells during growth and differentiation of roots in some monocotyledonous species. *Biochemie Und Physiologie Der Pflanzen* **177**: 319–336.
- Olszewska MJ, Osiecka R. 1983.** The relationship between 2C DNA content, life-cycle type, systematic position and the dynamics of DNA endoreplication in parenchyma nuclei during growth and differentiation of roots in some dicotyledonous-herbaceous species. *Biochemie Und Physiologie Der Pflanzen* **178**: 581–599.
- Paradis E, Claude J, Strimmer K. 2004.** APE: analyses of phylogenetics and evolution in R language. *Bioinformatics* **20**: 289–290.
- Pinheiro J, Bates D, DebRoy S, Sarkar D, R Core Team. 2013.** *nlme: Linear and Nonlinear Mixed Effects Models.* R package version 3.1-104. URL <http://cran.r-project.org/package=nlme>
- Pires JC, Lim KY, Kovarik A, Matyasek R, Boyd A, Leitch AR, Leitch IJ, Bennett MD, Soltis PS, Soltis DE. 2004.** Molecular cytogenetic analysis of recently evolved *Tragopogon* (Asteraceae) allopolyploids reveal a karyotype that is additive of the diploid progenitors. *American Journal of Botany* **91**: 1022–1035.
- Roser M. 1995.** Typification of the names of two widespread Eurasian grass species: *Avena pratensis* L. and *A. pubescens* Huds. (Poaceae: Helitotrichon) *Taxon* **44**: 395–399.
- Siljak-Yakovlev S, Pustahija F, Šolíc EM, Bogunic F, Muratovic E, Bašić N, Catrice O, Brown SC. 2010.** Towards a genome size and chromosome number database of Balkan flora: C-values in 343 taxa with novel values for 242. *Advanced Science Letters* **3**: 190–213.
- Šmarda P, Bureš P, Horová L, Foggi B, Rossi G. 2008.** Genome size and GC content evolution of *Festuca*: ancestral expansion and subsequent reduction. *Annals of Botany* **101**: 421–433.
- Šmarda P, Hejcman M, Březinová A, Horová L, Steigerová H, Zedek F, Bureš P, Hejcmanová P, Schellberg J. 2013.** Effect of phosphorus availability on the selection of species with different ploidy levels and genome sizes in a long-term grassland fertilization experiment. *New Phytologist* **200**: 911–921.
- Smith JB, Bennett MD. 1975.** DNA variation in the genus *Ranunculus*. *Heredity* **35**: 231–239.
- Temsch EM, Greilhuber J. 2010.** Genome size in Dipsacaceae and *Morina longifolia* (Morinaceae). *Plant Systematics and Evolution* **289**: 45–56.

**Temsch EM, Temsch W, Ehrendorfer-Schratt L, Greilhuber J. 2010.** Heavy metal pollution, selection, and genome size: the species of the Žerjav study revisited with flow cytometry. *Journal of Botany* **2010**: article ID 596542.
